# Supplementary material for: A positive feedback loop: RAD18-YAP-TGF-β between triple-negative breast cancer and macrophages regulates cancer stemness and progression
Source: PubMed Central journal article supplement (PMC9005530; doi:10.1038/s41420-022-00968-9), 2022-04-12

**Figure.21-CD44 (MDA-MB-231)**

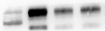

Figure.2I-CD44 (HCC-1806)

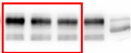

Figure.2A-GAPDH (MDA-MB-231)

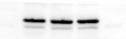

**Figure.2A-GAPDH (HCC-1806)**

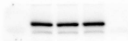

Figure. 2I-GAPDH (MDA-MB-231)

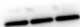

## Figure 21-GAPDH (HCC-1806)

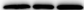

Figure.21-Nanog (MDA-MB-231)

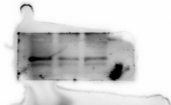

Figure.2I-Nanog (HCC-1806)

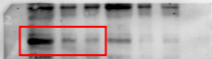



Figure.2I-OCT-4 (MDA-MB-231)

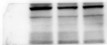

Figure.21-OCT-4 (HCC-1806)

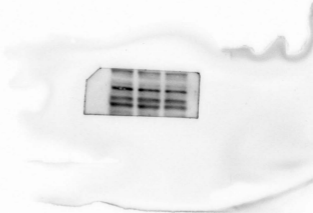

Figure.2A-RAD18 (MDA-MB-231)

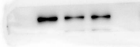

Figure.2A-RAD18 (HCC-1806)

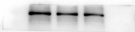

Figure. 2I-RAD18 (MDA-MB-231)

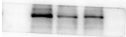

Figure.2I-RAD18 (HCC-1806)

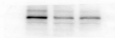

Figure.21-SOX2 (MDA-MB-231)

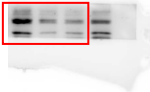

Figure.2I-SOX2 (HCC-1806)

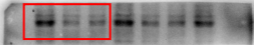

Supplement: 41420_2022_968_MOESM12_ESM.pdf [file 41420_2022_968_MOESM12_ESM.pdf]
