# Supplementary material for: A positive feedback loop: RAD18-YAP-TGF-β between triple-negative breast cancer and macrophages regulates cancer stemness and progression
Source: PubMed Central journal article supplement (PMC9005530; doi:10.1038/s41420-022-00968-9), 2022-04-12

BD FACSDiva 8.0.2

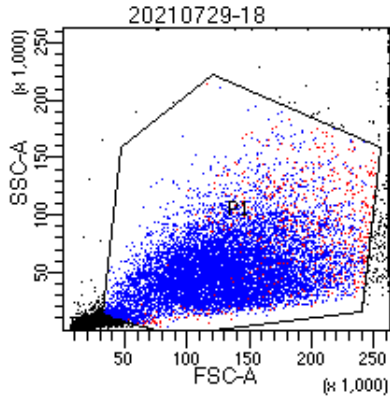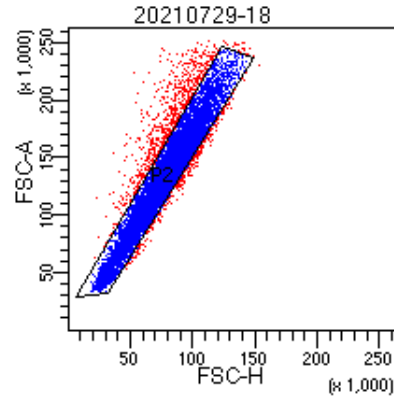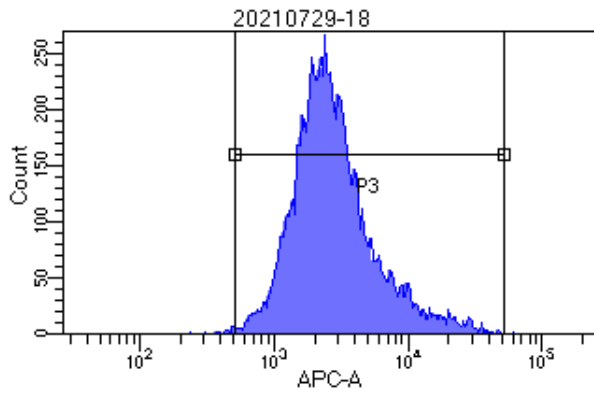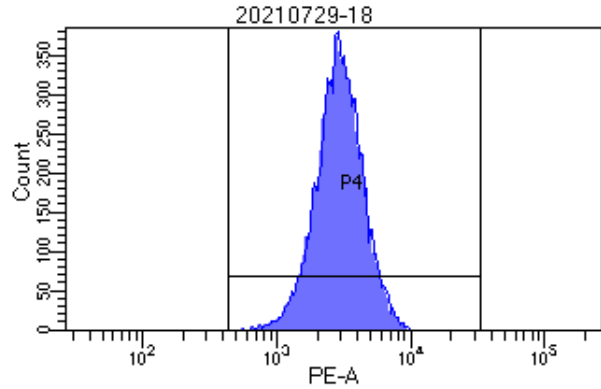

| Experiment Name:                       |         | YXQ-1                   |          |            |              |  |
|----------------------------------------|---------|-------------------------|----------|------------|--------------|--|
| Specimen Name:                         |         | 20210729                |          |            |              |  |
| Tube Name:                             |         | 18                      |          |            |              |  |
| Record Date:                           |         | Jul 29, 2021 5:52:52 PM |          |            |              |  |
| Population                             | #Events | %Pare...                | Geo M... | APC-A Mean | APC-A Median |  |
| <span style="color:red">■</span> P1    | 10,716  | 72.1                    | ####     | 4,105      | 2,512        |  |
| <span style="color:blue">■</span> P2   | 9,622   | 89.8                    | 2,693    | 3,940      | 2,420        |  |
| <input checked="" type="checkbox"/> P3 | 9,525   | 99.0                    | 2,720    | 3,828      | 2,433        |  |
| <input checked="" type="checkbox"/> P4 | 9,609   | 99.9                    | 2,695    | 3,941      | 2,422        |  |
| <input checked="" type="checkbox"/> Q1 | 1       | 0.0                     | 11,658   | 11,658     | 11,658       |  |
| <input checked="" type="checkbox"/> Q2 | 568     | 5.9                     | 18,768   | 21,192     | 17,179       |  |
| <input checked="" type="checkbox"/> Q3 | 0       | 0.0                     | ####     | ####       | ####         |  |
| <input checked="" type="checkbox"/> Q4 | 9,053   | 94.1                    | 2,384    | 2,857      | 2,320        |  |

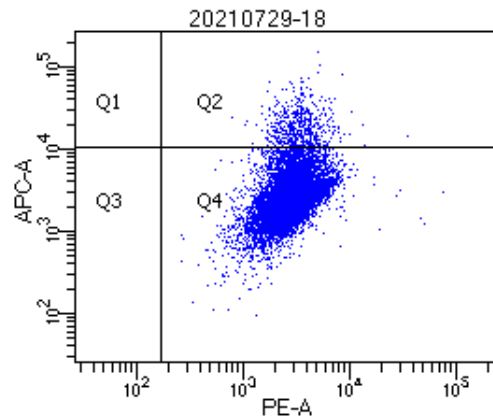

BD FACSDiva 8.0.2

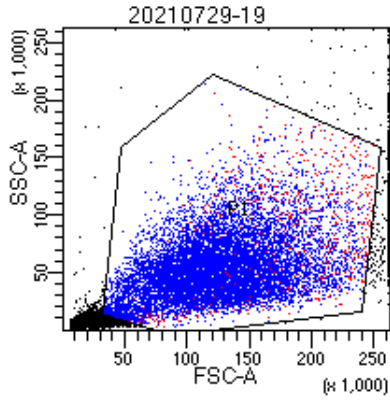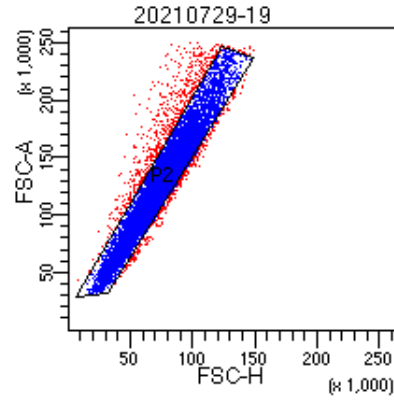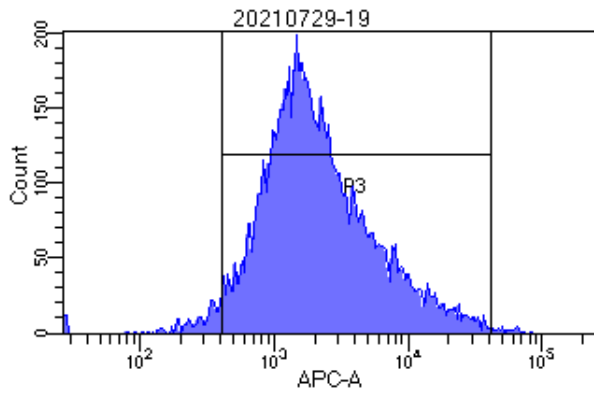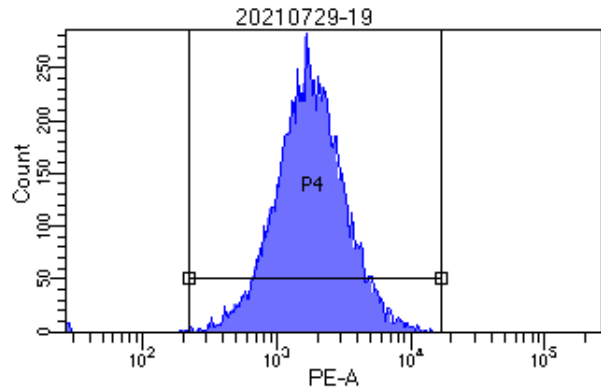

| Experiment Name:                       |         | YXQ-1                   |          |            |              |
|----------------------------------------|---------|-------------------------|----------|------------|--------------|
| Specimen Name:                         |         | 20210729                |          |            |              |
| Tube Name:                             |         | 19                      |          |            |              |
| Record Date:                           |         | Jul 29, 2021 5:54:14 PM |          |            |              |
| Population                             | #Events | %Pare...                | Geo M... | APC-A Mean | APC-A Median |
| <input checked="" type="checkbox"/> P1 | 10,781  | 63.4                    | ####     | 3,960      | 1,825        |
| <input checked="" type="checkbox"/> P2 | 9,811   | 91.0                    | ####     | 3,930      | 1,774        |
| <input checked="" type="checkbox"/> P3 | 9,355   | 95.4                    | 2.172    | 3,617      | 1,841        |
| <input checked="" type="checkbox"/> P4 | 9,746   | 99.3                    | ####     | 3,944      | 1,782        |
| <input checked="" type="checkbox"/> Q1 | 0       | 0.0                     | ####     | ####       | ####         |
| <input checked="" type="checkbox"/> Q2 | 748     | 7.6                     | 19,589   | 22,876     | 17,247       |
| <input checked="" type="checkbox"/> Q3 | 37      | 0.4                     | ####     | 487        | 337          |
| <input checked="" type="checkbox"/> Q4 | 9,026   | 92.0                    | ####     | 2,374      | 1,641        |

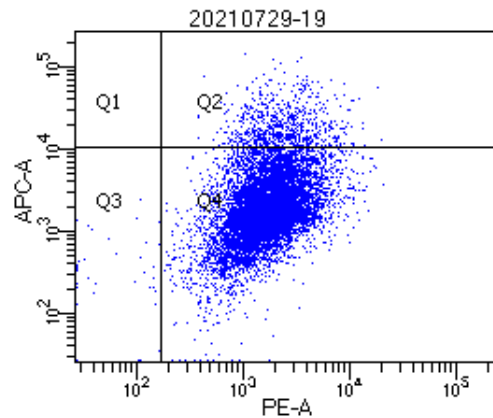

BD FACSDiva 8.0.2

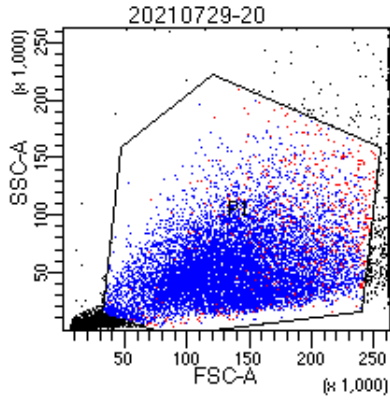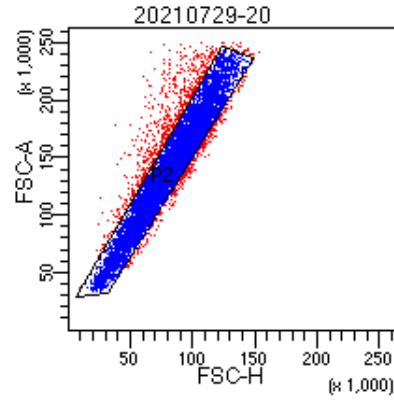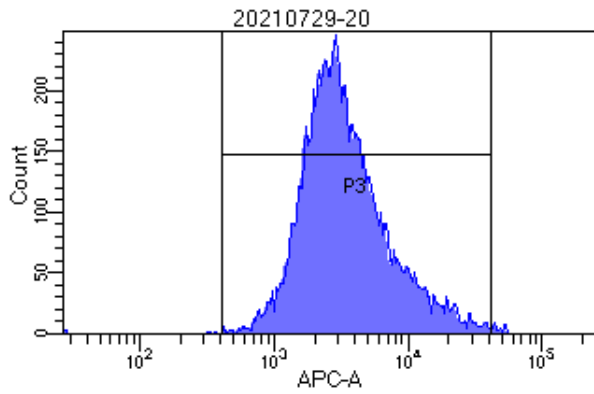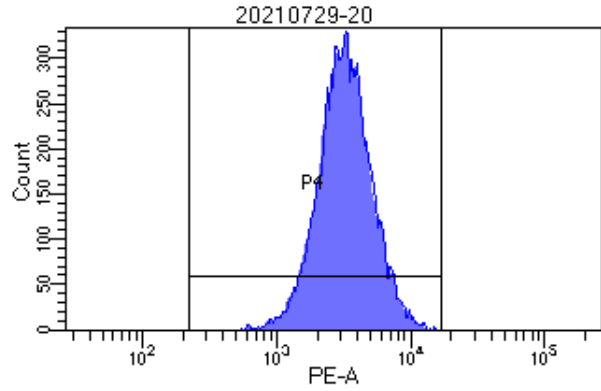

| Experiment Name:                       |         | YXQ-1                   |          |            |              |
|----------------------------------------|---------|-------------------------|----------|------------|--------------|
| Specimen Name:                         |         | 20210729                |          |            |              |
| Tube Name:                             |         | 20                      |          |            |              |
| Record Date:                           |         | Jul 29, 2021 5:55:12 PM |          |            |              |
| Population                             | #Events | %Pare...                | Geo M... | APC-A Mean | APC-A Median |
| <span style="color: red;">■</span> P1  | 10,840  | 66.5                    | ####     | 5,015      | 3,038        |
| <span style="color: blue;">■</span> P2 | 9,729   | 89.8                    | ####     | 4,837      | 2,921        |
| <input checked="" type="checkbox"/> P3 | 9,633   | 99.0                    | 3,278    | 4,587      | 2,916        |
| <input checked="" type="checkbox"/> P4 | 9,701   | 99.7                    | ####     | 4,839      | 2,921        |
| <input checked="" type="checkbox"/> Q1 | 0       | 0.0                     | ####     | ####       | ####         |
| <input checked="" type="checkbox"/> Q2 | 889     | 9.1                     | 17,991   | 20,068     | 16,301       |
| <input checked="" type="checkbox"/> Q3 | 8       | 0.1                     | ####     | 2,033      | 1,258        |
| <input checked="" type="checkbox"/> Q4 | 8,832   | 90.8                    | ####     | 3,306      | 2,730        |

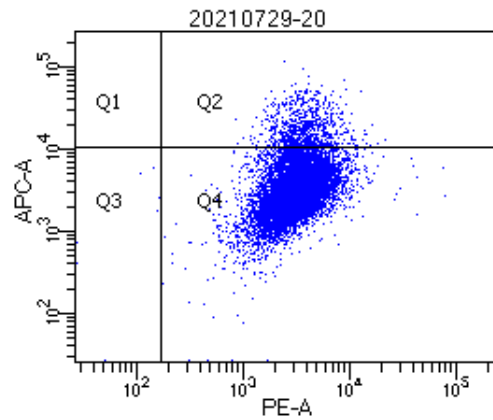

BD FACSDiva 8.0.2

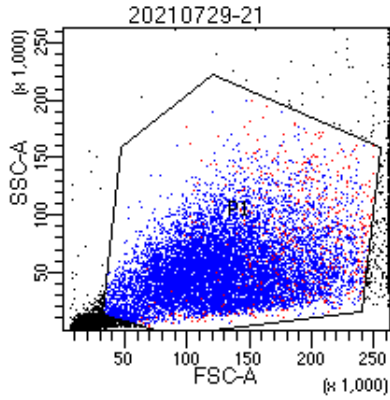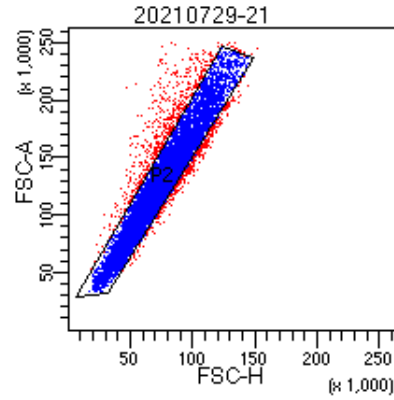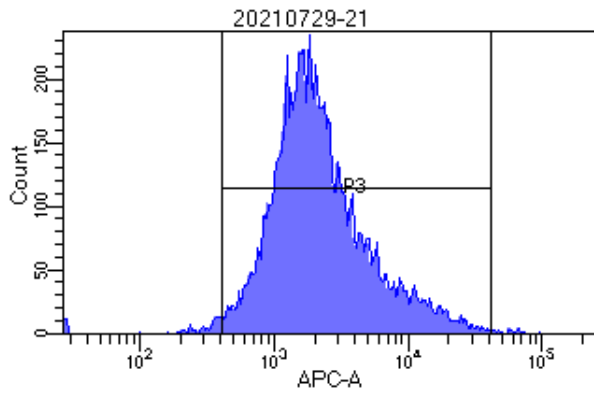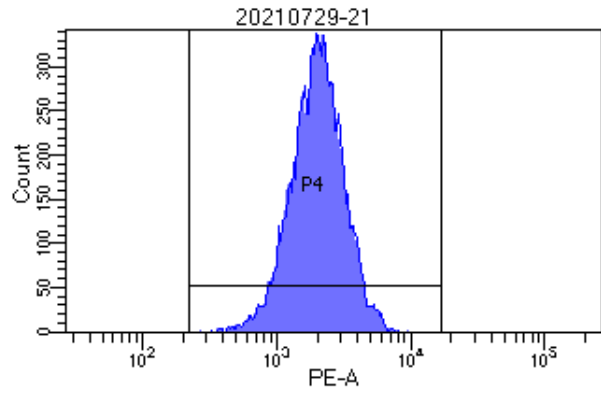

| Experiment Name:                       |         | YXQ-1                   |          |            |              |  |
|----------------------------------------|---------|-------------------------|----------|------------|--------------|--|
| Specimen Name:                         |         | 20210729                |          |            |              |  |
| Tube Name:                             |         | 21                      |          |            |              |  |
| Record Date:                           |         | Jul 29, 2021 5:55:54 PM |          |            |              |  |
| Population                             | #Events | %Pare...                | Geo M... | APC-A Mean | APC-A Median |  |
| <span style="color: red;">■</span> P1  | 10,824  | 73.2                    | ####     | 3,727      | 1,919        |  |
| <span style="color: blue;">■</span> P2 | 9,812   | 90.7                    | ####     | 3,650      | 1,859        |  |
| <input checked="" type="checkbox"/> P3 | 9,557   | 97.4                    | 2,179    | 3,356      | 1,884        |  |
| <input checked="" type="checkbox"/> P4 | 9,790   | 99.8                    | ####     | 3,654      | 1,862        |  |
| <input checked="" type="checkbox"/> Q1 | 1       | 0.0                     | 10,928   | 10,928     | 10,928       |  |
| <input checked="" type="checkbox"/> Q2 | 654     | 6.7                     | 18,639   | 21,659     | 16,460       |  |
| <input checked="" type="checkbox"/> Q3 | 9       | 0.1                     | ####     | 1,048      | 639          |  |
| <input checked="" type="checkbox"/> Q4 | 9,148   | 93.2                    | ####     | 2,364      | 1,760        |  |

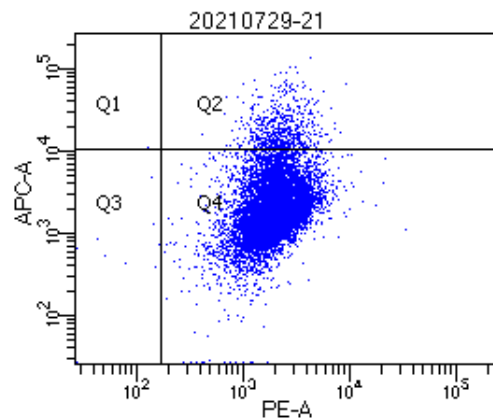

BD FACSDiva 8.0.2

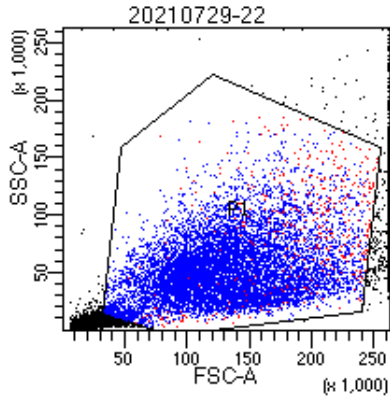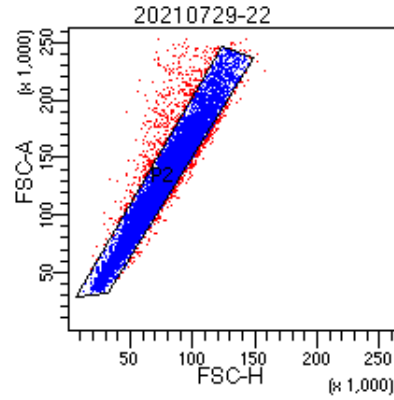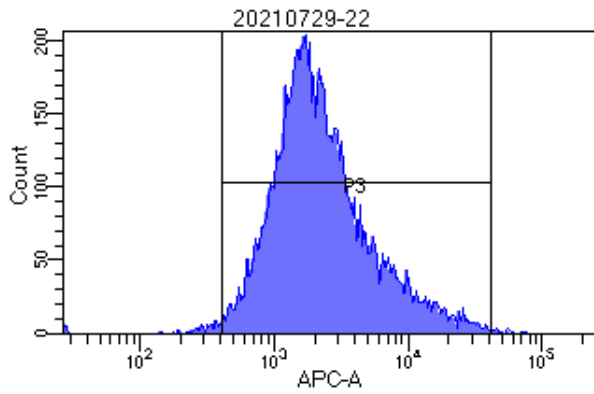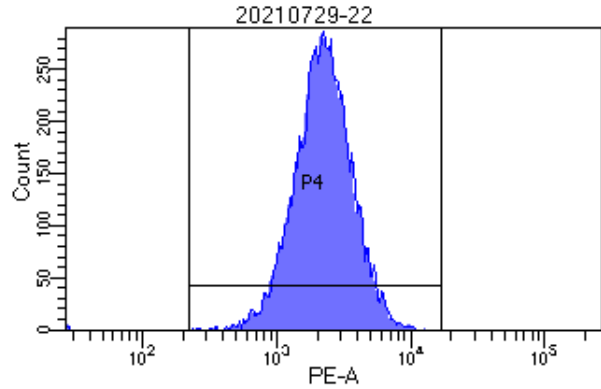

| Experiment Name:                       |         | YXQ-1                   |          |            |              |  |
|----------------------------------------|---------|-------------------------|----------|------------|--------------|--|
| Specimen Name:                         |         | 20210729                |          |            |              |  |
| Tube Name:                             |         | 22                      |          |            |              |  |
| Record Date:                           |         | Jul 29, 2021 5:56:41 PM |          |            |              |  |
| Population                             | #Events | %Pare...                | Geo M... | APC-A Mean | APC-A Median |  |
| <span style="color: red;">■</span> P1  | 10,000  | 68.0                    | ####     | 3,790      | 1,962        |  |
| <span style="color: blue;">■</span> P2 | 9,143   | 91.4                    | ####     | 3,730      | 1,913        |  |
| <input checked="" type="checkbox"/> P3 | 8,946   | 97.8                    | 2,228    | 3,468      | 1,929        |  |
| <input checked="" type="checkbox"/> P4 | 9,122   | 99.8                    | ####     | 3,735      | 1,914        |  |
| <input checked="" type="checkbox"/> Q1 | 0       | 0.0                     | ####     | ####       | ####         |  |
| <input checked="" type="checkbox"/> Q2 | 604     | 6.6                     | 19,005   | 21,989     | 16,887       |  |
| <input checked="" type="checkbox"/> Q3 | 15      | 0.2                     | 636      | 944        | 795          |  |
| <input checked="" type="checkbox"/> Q4 | 8,524   | 93.2                    | ####     | 2,441      | 1,790        |  |

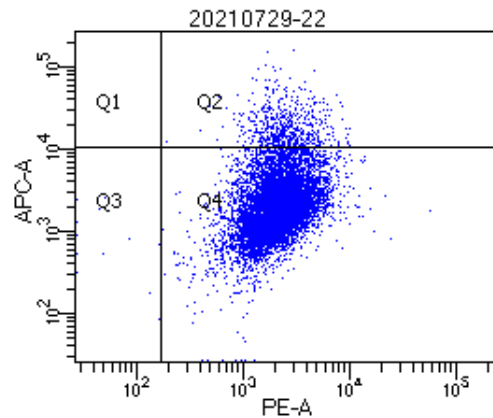

BD FACSDiva 8.0.2

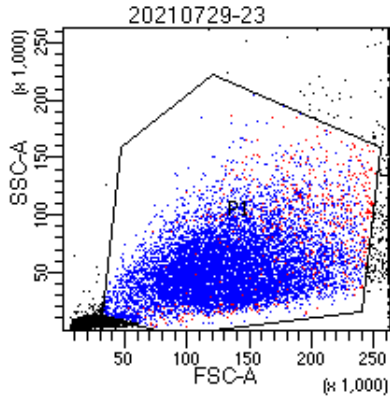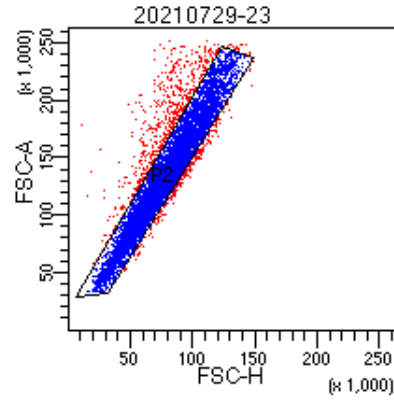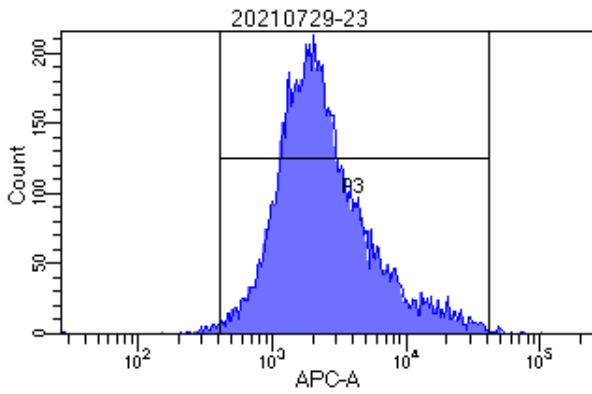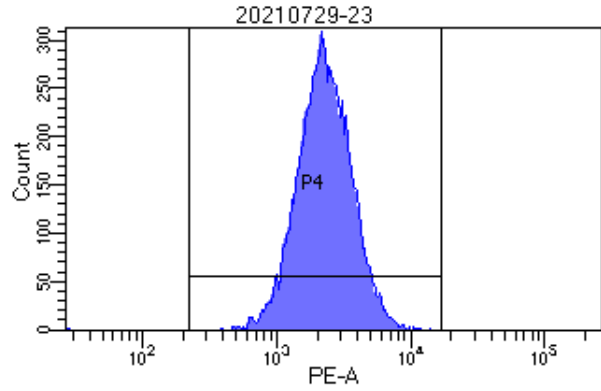

| Experiment Name:                       |         | YXQ-1                   |                   |               |                 |
|----------------------------------------|---------|-------------------------|-------------------|---------------|-----------------|
| Specimen Name:                         |         | 20210729                |                   |               |                 |
| Tube Name:                             |         | 23                      |                   |               |                 |
| Record Date:                           |         | Jul 29, 2021 5:57:45 PM |                   |               |                 |
| Population                             | #Events | %Pare...                | APC-A<br>Geo M... | APC-A<br>Mean | APC-A<br>Median |
| <span style="color:red">■</span> P1    | 10,010  | 73.2                    | ####              | 3,967         | 2,136           |
| <span style="color:blue">■</span> P2   | 9,114   | 91.0                    | ####              | 3,880         | 2,069           |
| <input checked="" type="checkbox"/> P3 | 8,961   | 98.3                    | 2,389             | 3,636         | 2,080           |
| <input checked="" type="checkbox"/> P4 | 9,105   | 99.9                    | ####              | 3,883         | 2,070           |
| <input checked="" type="checkbox"/> Q1 | 0       | 0.0                     | ####              | ####          | ####            |
| <input checked="" type="checkbox"/> Q2 | 639     | 7.0                     | 19,004            | 21,647        | 17,290          |
| <input checked="" type="checkbox"/> Q3 | 6       | 0.1                     | 508               | 723           | 674             |
| <input checked="" type="checkbox"/> Q4 | 8,469   | 92.9                    | ####              | 2,542         | 1,953           |

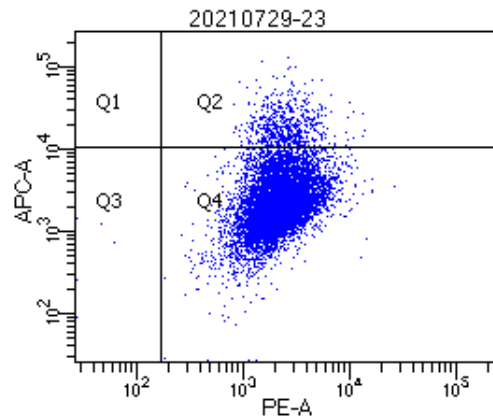

BD FACSDiva 8.0.2

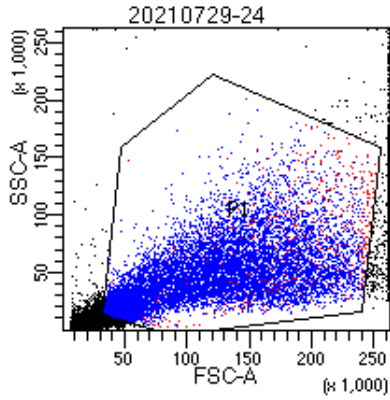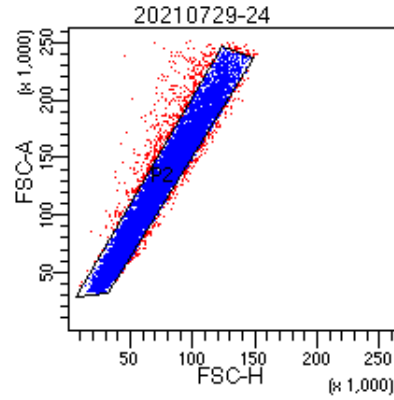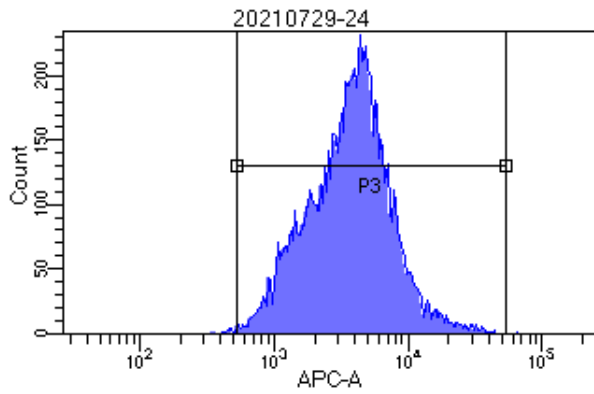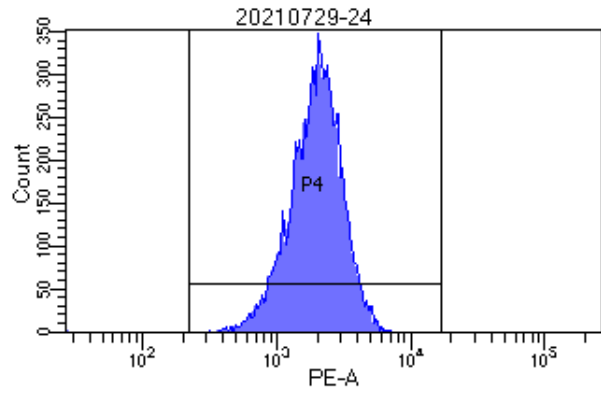

| Experiment Name:                       |         | YXQ-1                   |          |            |              |  |
|----------------------------------------|---------|-------------------------|----------|------------|--------------|--|
| Specimen Name:                         |         | 20210729                |          |            |              |  |
| Tube Name:                             |         | 24                      |          |            |              |  |
| Record Date:                           |         | Jul 29, 2021 5:58:52 PM |          |            |              |  |
| Population                             | #Events | %Pare...                | Geo M... | APC-A Mean | APC-A Median |  |
| <span style="color: red;">■</span> P1  | 10,000  | 56.5                    | ####     | 4,835      | 3,770        |  |
| <span style="color: blue;">■</span> P2 | 9,164   | 91.6                    | ####     | 4,684      | 3,651        |  |
| <input checked="" type="checkbox"/> P3 | 9,098   | 99.3                    | 3,499    | 4,597      | 3,665        |  |
| <input checked="" type="checkbox"/> P4 | 9,149   | 99.8                    | ####     | 4,690      | 3,659        |  |
| <input checked="" type="checkbox"/> Q1 | 0       | 0.0                     | ####     | ####       | ####         |  |
| <input checked="" type="checkbox"/> Q2 | 538     | 5.9                     | 16,910   | 19,177     | 14,884       |  |
| <input checked="" type="checkbox"/> Q3 | 10      | 0.1                     | 758      | 862        | 885          |  |
| <input checked="" type="checkbox"/> Q4 | 8,616   | 94.0                    | ####     | 3,784      | 3,487        |  |

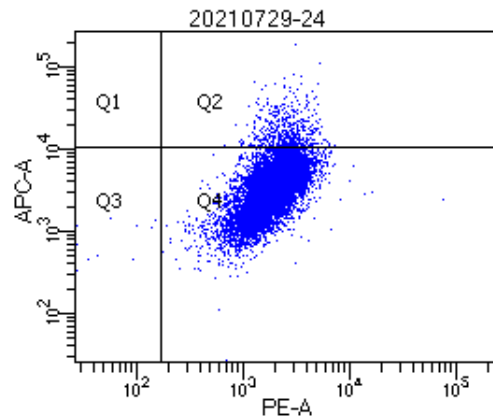

BD FACSDiva 8.0.2

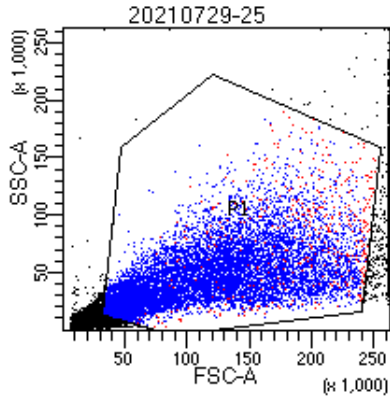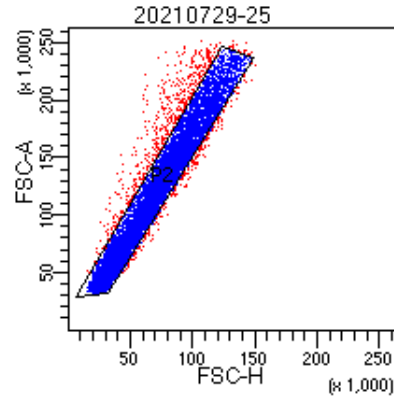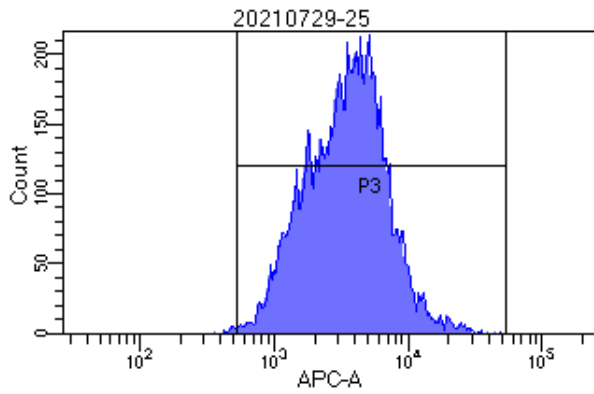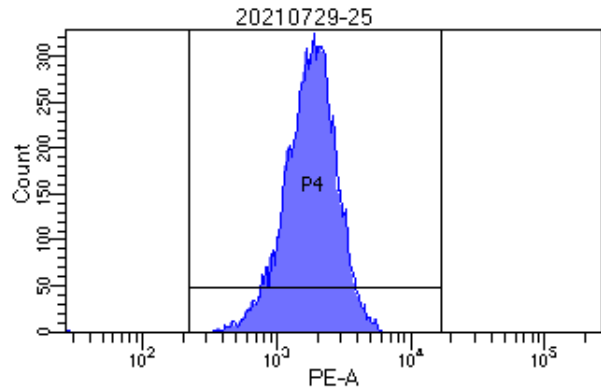

| Experiment Name:                       |         | YXQ-1                   |          |            |              |  |
|----------------------------------------|---------|-------------------------|----------|------------|--------------|--|
| Specimen Name:                         |         | 20210729                |          |            |              |  |
| Tube Name:                             |         | 25                      |          |            |              |  |
| Record Date:                           |         | Jul 29, 2021 5:59:48 PM |          |            |              |  |
| Population                             | #Events | %Pare...                | Geo M... | APC-A Mean | APC-A Median |  |
| <span style="color: red;">■</span> P1  | 10,000  | 54.0                    | ####     | 4,472      | 3,550        |  |
| <span style="color: blue;">■</span> P2 | 9,194   | 91.9                    | ####     | 4,269      | 3,405        |  |
| <input checked="" type="checkbox"/> P3 | 9,144   | 99.5                    | 3,302    | 4,261      | 3,421        |  |
| <input checked="" type="checkbox"/> P4 | 9,172   | 99.8                    | 3,283    | 4,276      | 3,410        |  |
| <input checked="" type="checkbox"/> Q1 | 0       | 0.0                     | ####     | ####       | ####         |  |
| <input checked="" type="checkbox"/> Q2 | 408     | 4.4                     | 16,176   | 17,684     | 14,324       |  |
| <input checked="" type="checkbox"/> Q3 | 15      | 0.2                     | 835      | 983        | 897          |  |
| <input checked="" type="checkbox"/> Q4 | 8,771   | 95.4                    | ####     | 3,650      | 3,290        |  |

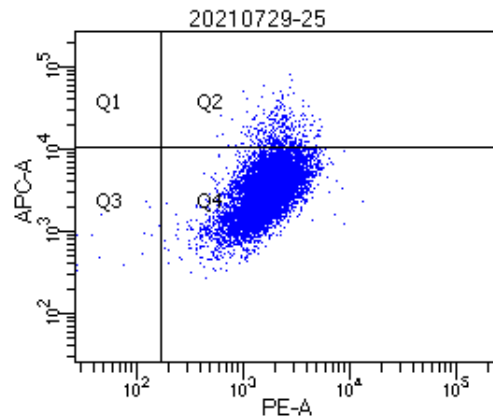



BD FACSDiva 8.0.2

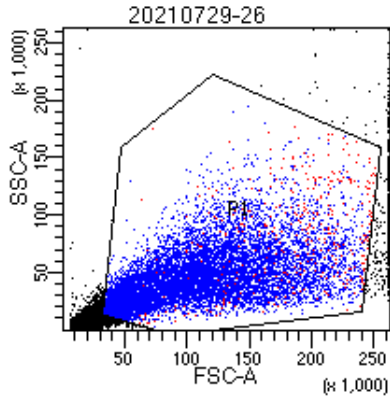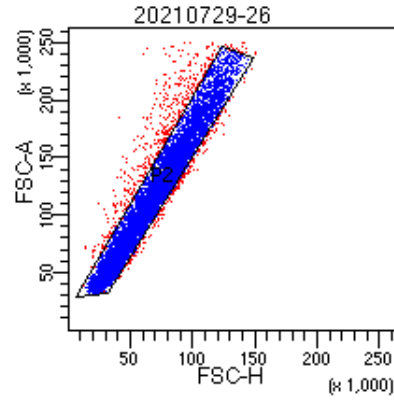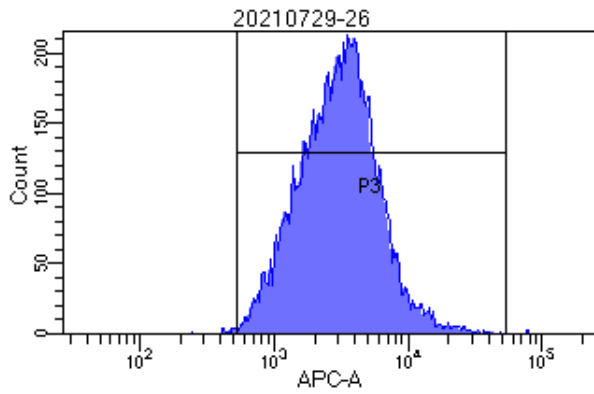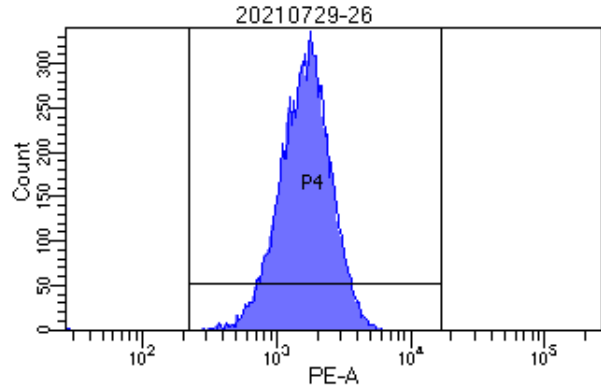

| Experiment Name:                       | YXQ-1                   |          |          |        |        |
|----------------------------------------|-------------------------|----------|----------|--------|--------|
| Specimen Name:                         | 20210729                |          |          |        |        |
| Tube Name:                             | 26                      |          |          |        |        |
| Record Date:                           | Jul 29, 2021 6:01:32 PM |          |          |        |        |
|                                        |                         |          | APC-A    | APC-A  | APC-A  |
| Population                             | #Events                 | %Pare... | Geo M... | Mean   | Median |
| <span style="color: red;">■</span> P1  | 10,000                  | 57.9     | 2,989    | 4,019  | 3,049  |
| <span style="color: blue;">■</span> P2 | 9,265                   | 92.7     | 2,893    | 3,867  | 2,942  |
| <input checked="" type="checkbox"/> P3 | 9,195                   | 99.2     | 2,916    | 3,774  | 2,956  |
| <input checked="" type="checkbox"/> P4 | 9,242                   | 99.8     | 2,902    | 3,874  | 2,948  |
| <input checked="" type="checkbox"/> Q1 | 0                       | 0.0      | ####     | ####   | ####   |
| <input checked="" type="checkbox"/> Q2 | 345                     | 3.7      | 17,351   | 20,148 | 14,674 |
| <input checked="" type="checkbox"/> Q3 | 18                      | 0.2      | 761      | 1,042  | 751    |
| <input checked="" type="checkbox"/> Q4 | 8,902                   | 96.1     | 2,706    | 3,242  | 2,854  |

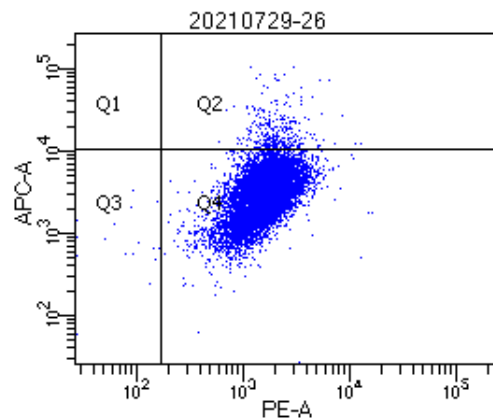

BD FACSDiva 8.0.2

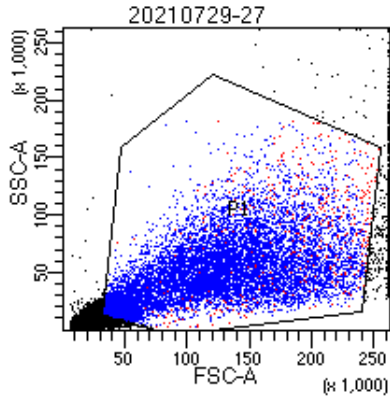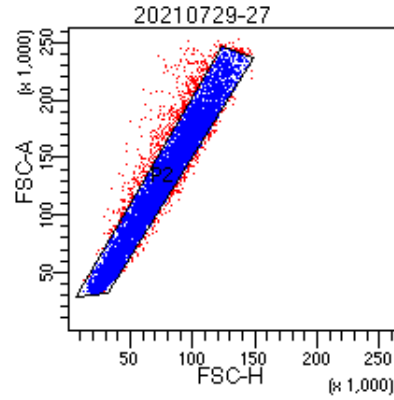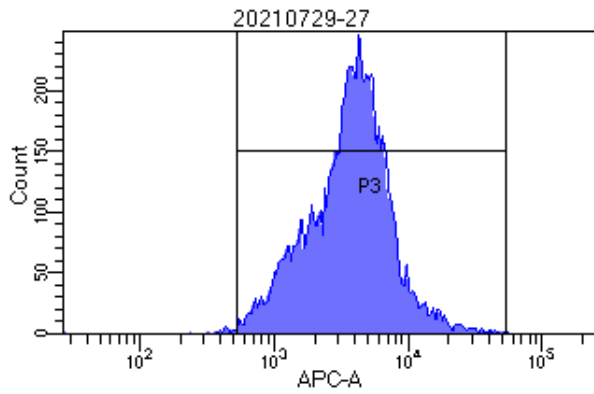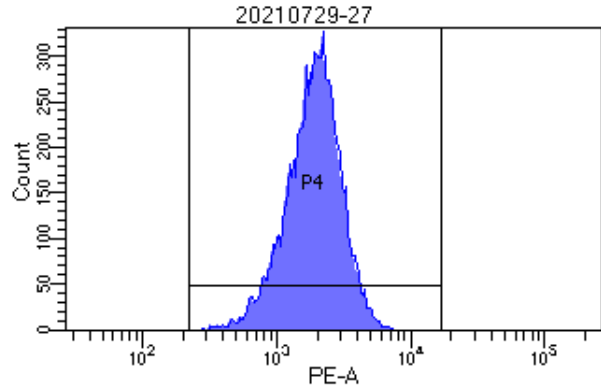

| Experiment Name:                       |         | YXQ-1                   |          |            |              |  |
|----------------------------------------|---------|-------------------------|----------|------------|--------------|--|
| Specimen Name:                         |         | 20210729                |          |            |              |  |
| Tube Name:                             |         | 27                      |          |            |              |  |
| Record Date:                           |         | Jul 29, 2021 6:02:19 PM |          |            |              |  |
| Population                             | #Events | %Pare...                | Geo M... | APC-A Mean | APC-A Median |  |
| <span style="color: red;">■</span> P1  | 10,000  | 49.3                    | ####     | 4,764      | 3,778        |  |
| <span style="color: blue;">■</span> P2 | 9,237   | 92.4                    | ####     | 4,575      | 3,651        |  |
| <input checked="" type="checkbox"/> P3 | 9,143   | 99.0                    | 3,477    | 4,559      | 3,681        |  |
| <input checked="" type="checkbox"/> P4 | 9,220   | 99.8                    | ####     | 4,582      | 3,657        |  |
| <input checked="" type="checkbox"/> Q1 | 0       | 0.0                     | ####     | ####       | ####         |  |
| <input checked="" type="checkbox"/> Q2 | 507     | 5.5                     | 16,937   | 18,848     | 15,000       |  |
| <input checked="" type="checkbox"/> Q3 | 8       | 0.1                     | 927      | 1,073      | 876          |  |
| <input checked="" type="checkbox"/> Q4 | 8,722   | 94.4                    | ####     | 3,749      | 3,509        |  |

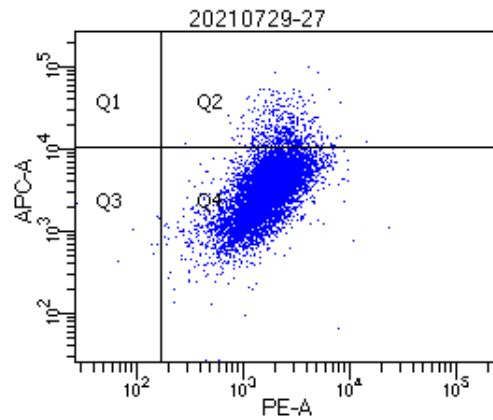

BD FACSDiva 8.0.2

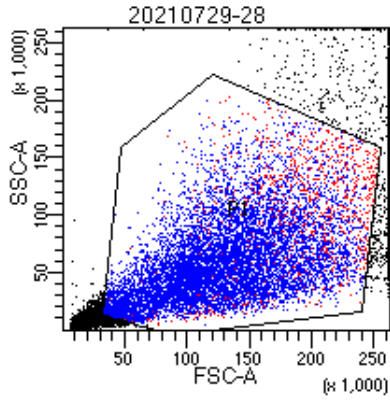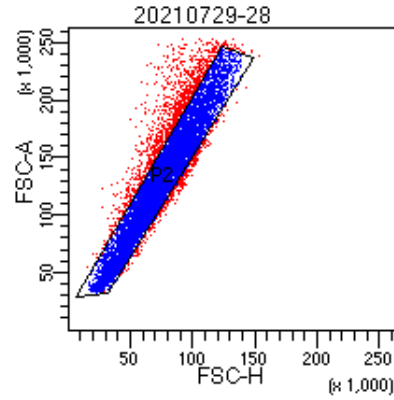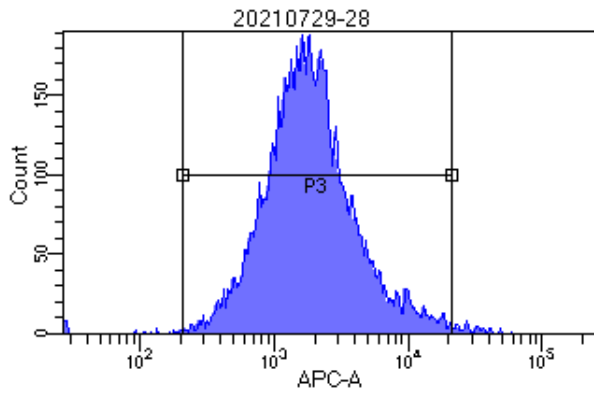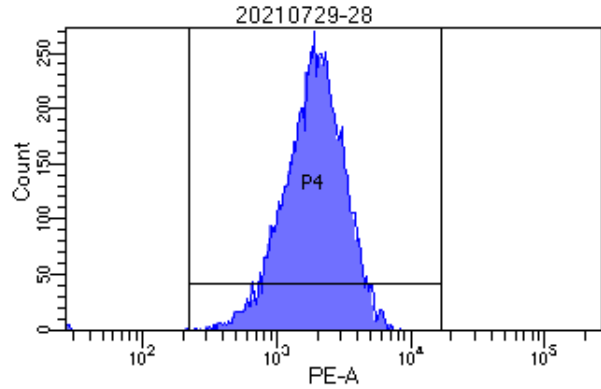

| Experiment Name:                       |         | YXQ-1                   |          |            |              |
|----------------------------------------|---------|-------------------------|----------|------------|--------------|
| Specimen Name:                         |         | 20210729                |          |            |              |
| Tube Name:                             |         | 28                      |          |            |              |
| Record Date:                           |         | Jul 29, 2021 6:03:06 PM |          |            |              |
| Population                             | #Events | %Pare...                | Geo M... | APC-A Mean | APC-A Median |
| <span style="color: red;">■</span> P1  | 10,000  | 59.4                    | ####     | 3,170      | 1,833        |
| <span style="color: blue;">■</span> P2 | 8,567   | 85.7                    | ####     | 2,919      | 1,703        |
| <input checked="" type="checkbox"/> P3 | 8,403   | 98.1                    | 1,774    | 2,483      | 1,697        |
| <input checked="" type="checkbox"/> P4 | 8,540   | 99.7                    | ####     | 2,925      | 1,708        |
| <input checked="" type="checkbox"/> Q1 | 0       | 0.0                     | ####     | ####       | ####         |
| <input checked="" type="checkbox"/> Q2 | 331     | 3.9                     | 18,748   | 22,155     | 16,450       |
| <input checked="" type="checkbox"/> Q3 | 17      | 0.2                     | 372      | 451        | 421          |
| <input checked="" type="checkbox"/> Q4 | 8,219   | 95.9                    | ####     | 2,149      | 1,654        |

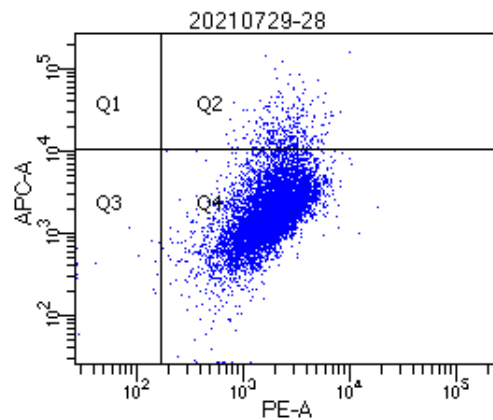

BD FACSDiva 8.0.2

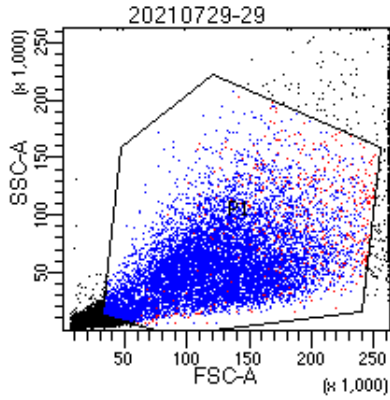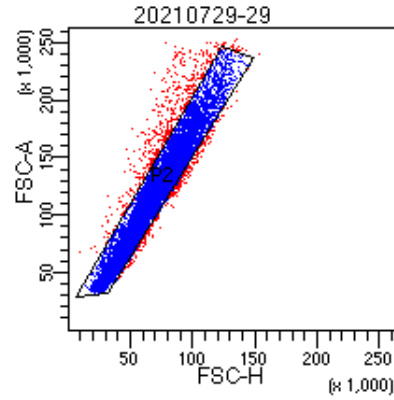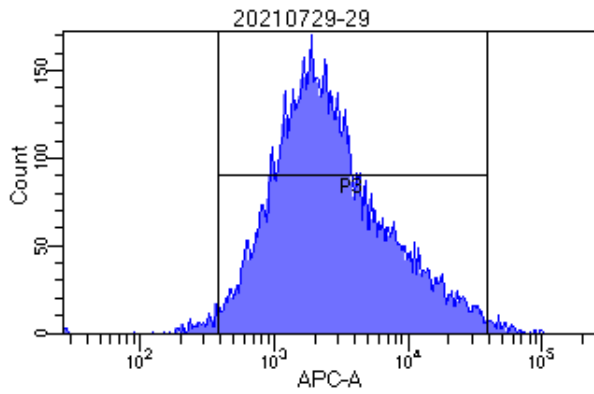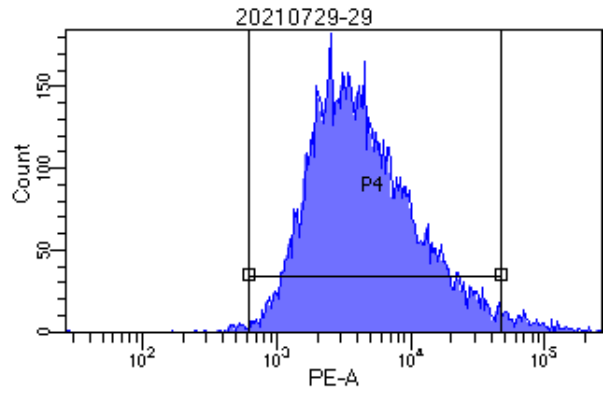

| Experiment Name:                       |         | YXQ-1                   |          |            |              |  |
|----------------------------------------|---------|-------------------------|----------|------------|--------------|--|
| Specimen Name:                         |         | 20210729                |          |            |              |  |
| Tube Name:                             |         | 29                      |          |            |              |  |
| Record Date:                           |         | Jul 29, 2021 6:04:10 PM |          |            |              |  |
| Population                             | #Events | %Pare...                | Geo M... | APC-A Mean | APC-A Median |  |
| <span style="color: red;">■</span> P1  | 10,000  | 64.5                    | ####     | 5,119      | 2,317        |  |
| <span style="color: blue;">■</span> P2 | 9,173   | 91.7                    | ####     | 4,971      | 2,253        |  |
| <input checked="" type="checkbox"/> P3 | 8,880   | 96.8                    | 2,597    | 4,349      | 2,271        |  |
| <input checked="" type="checkbox"/> P4 | 8,799   | 95.9                    | ####     | 4,967      | 2,250        |  |
| <input checked="" type="checkbox"/> Q1 | 0       | 0.0                     | ####     | ####       | ####         |  |
| <input checked="" type="checkbox"/> Q2 | 1,015   | 11.1                    | 19,698   | 23,179     | 17,342       |  |
| <input checked="" type="checkbox"/> Q3 | 10      | 0.1                     | 655      | 847        | 549          |  |
| <input checked="" type="checkbox"/> Q4 | 8,148   | 88.8                    | ####     | 2,708      | 1,983        |  |

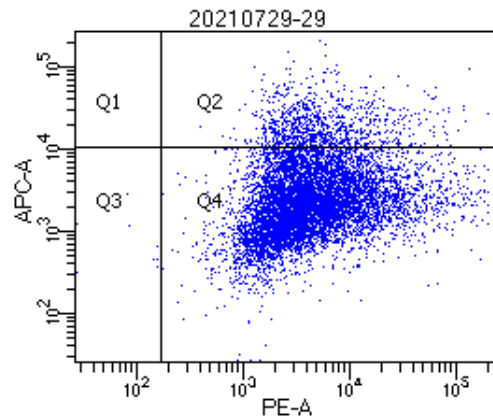

BD FACSDiva 8.0.2

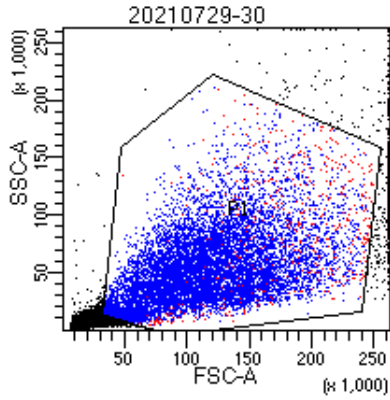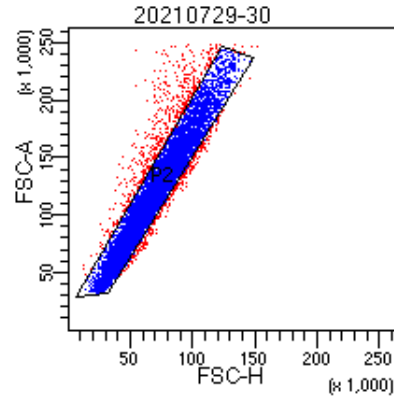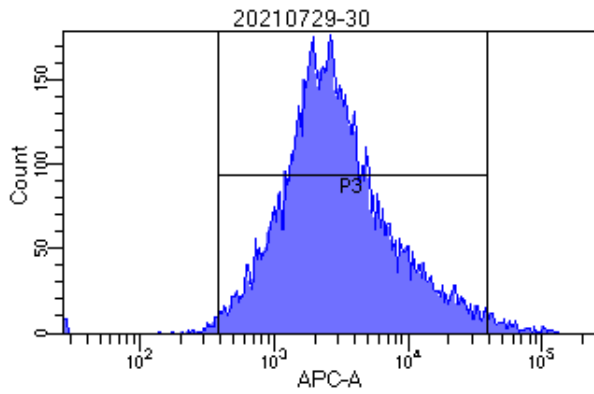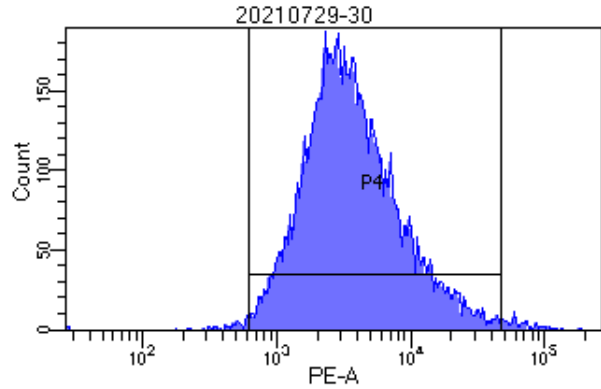

| Experiment Name:                       |         | YXQ-1                   |          |            |              |
|----------------------------------------|---------|-------------------------|----------|------------|--------------|
| Specimen Name:                         |         | 20210729                |          |            |              |
| Tube Name:                             |         | 30                      |          |            |              |
| Record Date:                           |         | Jul 29, 2021 6:05:06 PM |          |            |              |
| Population                             | #Events | %Pare...                | Geo M... | APC-A Mean | APC-A Median |
| <span style="color: red;">■</span> P1  | 10,000  | 64.4                    | ####     | 5,810      | 2,631        |
| <span style="color: blue;">■</span> P2 | 9,126   | 91.3                    | ####     | 5,630      | 2,553        |
| <input checked="" type="checkbox"/> P3 | 8,825   | 96.7                    | 2.820    | 4,489      | 2,539        |
| <input checked="" type="checkbox"/> P4 | 8,852   | 97.0                    | ####     | 5,649      | 2,562        |
| <input checked="" type="checkbox"/> Q1 | 1       | 0.0                     | 27.709   | 27,709     | 27,709       |
| <input checked="" type="checkbox"/> Q2 | 1,041   | 11.4                    | 21.564   | 26,731     | 18,767       |
| <input checked="" type="checkbox"/> Q3 | 12      | 0.1                     | 598      | 2,101      | 1,408        |
| <input checked="" type="checkbox"/> Q4 | 8,072   | 88.5                    | ####     | 2,912      | 2,282        |

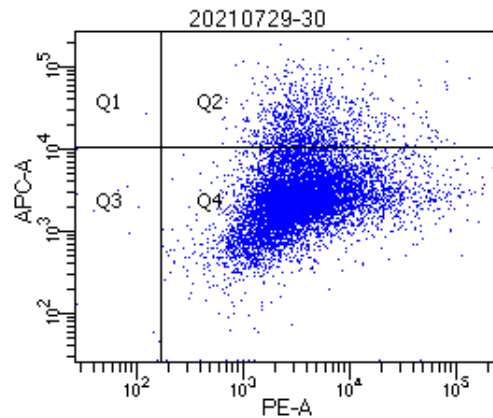

BD FACSDiva 8.0.2

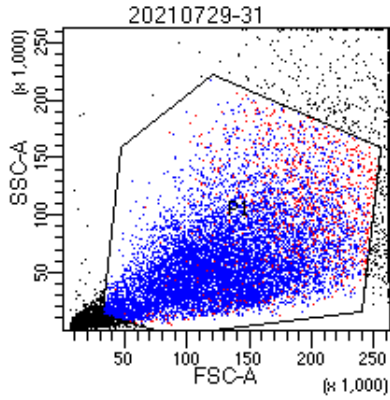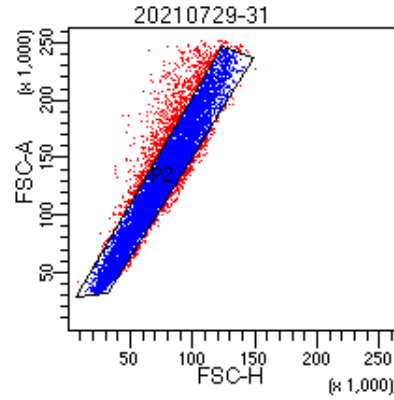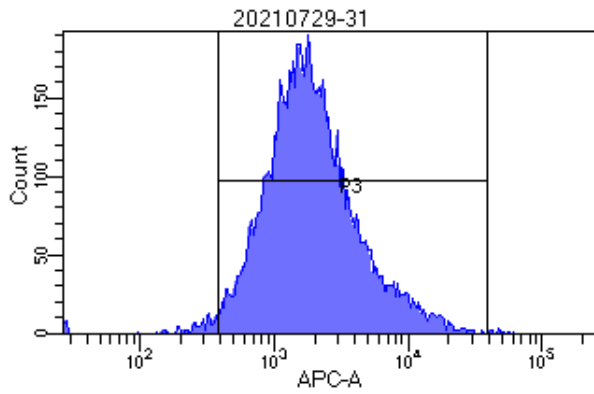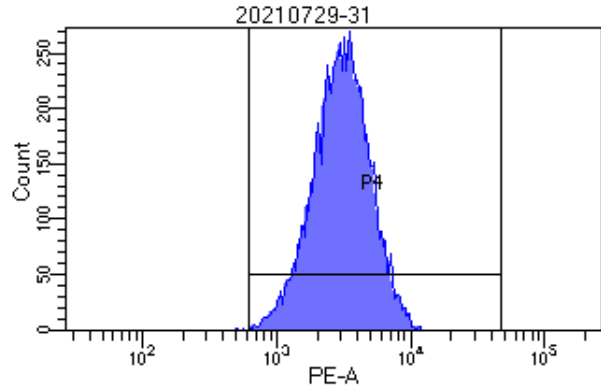

| Experiment Name:                       |         | YXQ-1                   |          |            |              |  |
|----------------------------------------|---------|-------------------------|----------|------------|--------------|--|
| Specimen Name:                         |         | 20210729                |          |            |              |  |
| Tube Name:                             |         | 31                      |          |            |              |  |
| Record Date:                           |         | Jul 29, 2021 6:05:55 PM |          |            |              |  |
| Population                             | #Events | %Pare...                | Geo M... | APC-A Mean | APC-A Median |  |
| <input checked="" type="checkbox"/> P1 | 10,000  | 64.1                    | ####     | 3,188      | 1,825        |  |
| <input checked="" type="checkbox"/> P2 | 8,598   | 86.0                    | ####     | 2,943      | 1,700        |  |
| <input checked="" type="checkbox"/> P3 | 8,371   | 97.4                    | 1.894    | 2,746      | 1,725        |  |
| <input checked="" type="checkbox"/> P4 | 8,560   | 99.6                    | ####     | 2,953      | 1,704        |  |
| <input checked="" type="checkbox"/> Q1 | 0       | 0.0                     | ####     | ####       | ####         |  |
| <input checked="" type="checkbox"/> Q2 | 334     | 3.9                     | 18,063   | 21,275     | 15,504       |  |
| <input checked="" type="checkbox"/> Q3 | 1       | 0.0                     | 355      | 355        | 355          |  |
| <input checked="" type="checkbox"/> Q4 | 8,263   | 96.1                    | ####     | 2,202      | 1,649        |  |

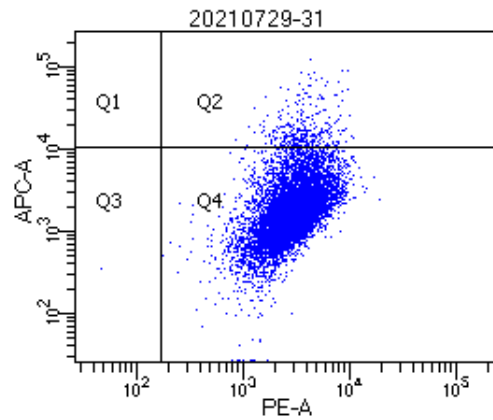

BD FACSDiva 8.0.2

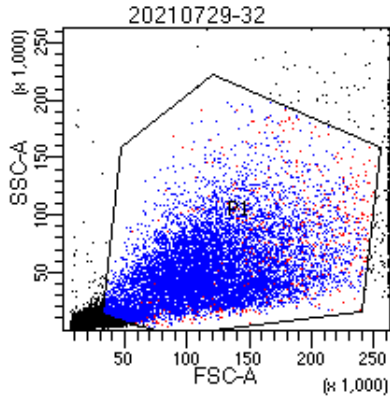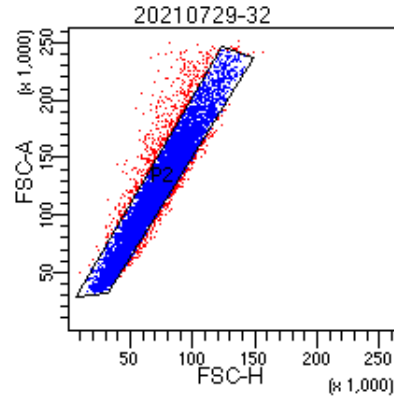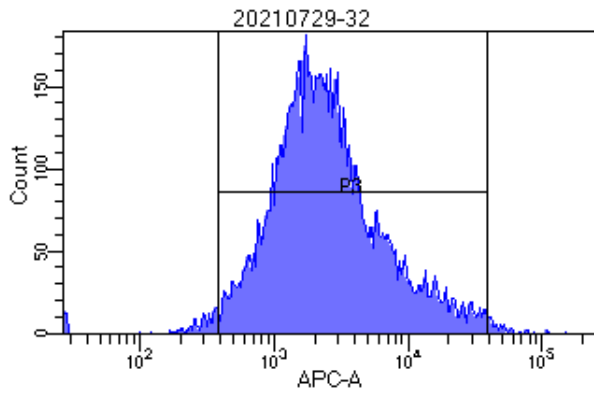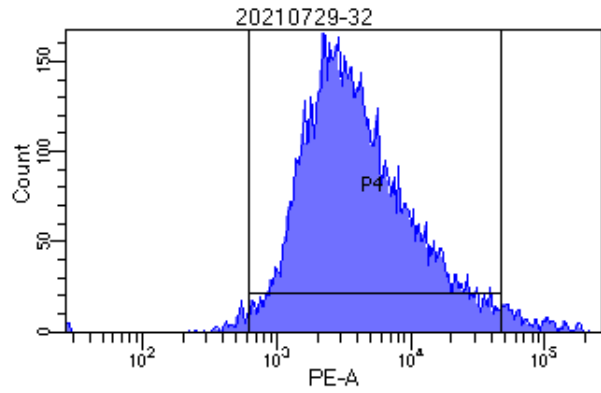

| Experiment Name:                       |         | YXQ-1                   |          |            |              |  |
|----------------------------------------|---------|-------------------------|----------|------------|--------------|--|
| Specimen Name:                         |         | 20210729                |          |            |              |  |
| Tube Name:                             |         | 32                      |          |            |              |  |
| Record Date:                           |         | Jul 29, 2021 6:06:51 PM |          |            |              |  |
| Population                             | #Events | %Pare...                | Geo M... | APC-A Mean | APC-A Median |  |
| <span style="color: red;">■</span> P1  | 10,000  | 62.5                    | ####     | 4,741      | 2,197        |  |
| <span style="color: blue;">■</span> P2 | 9,173   | 91.7                    | ####     | 4,648      | 2,147        |  |
| <input checked="" type="checkbox"/> P3 | 8,860   | 96.6                    | 2,454    | 4,052      | 2,177        |  |
| <input checked="" type="checkbox"/> P4 | 8,683   | 94.7                    | ####     | 4,680      | 2,154        |  |
| <input checked="" type="checkbox"/> Q1 | 0       | 0.0                     | ####     | ####       | ####         |  |
| <input checked="" type="checkbox"/> Q2 | 847     | 9.2                     | 20,832   | 24,911     | 18,279       |  |
| <input checked="" type="checkbox"/> Q3 | 11      | 0.1                     | 321      | 568        | 407          |  |
| <input checked="" type="checkbox"/> Q4 | 8,315   | 90.6                    | ####     | 2,590      | 1,951        |  |

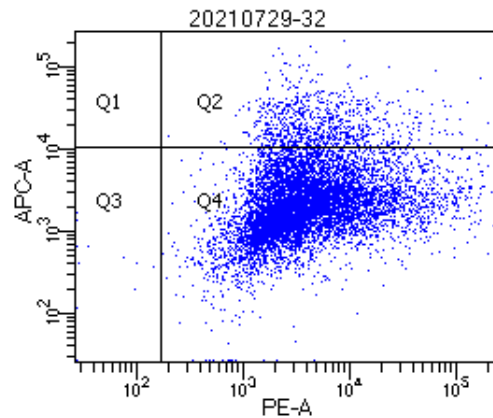

BD FACSDiva 8.0.2

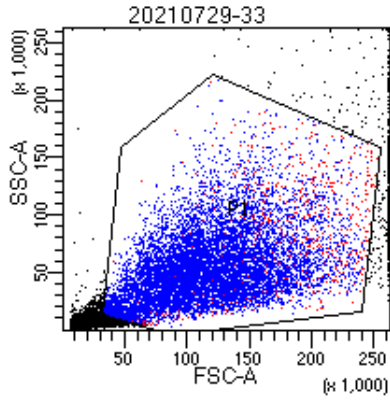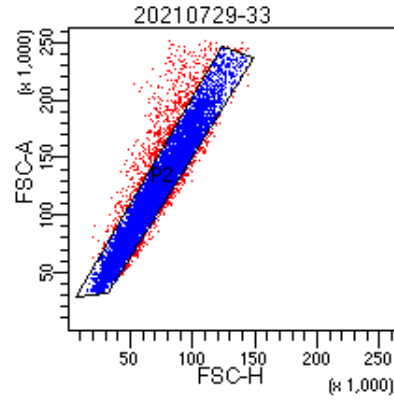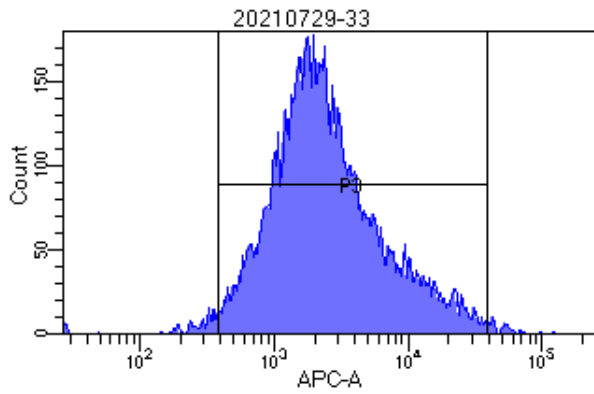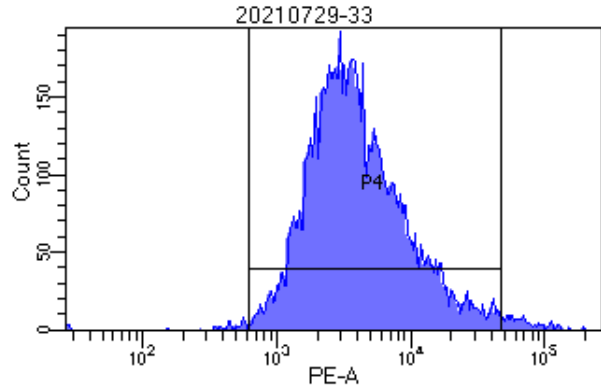

| Experiment Name:                       |         | YXQ-1                   |          |            |              |  |
|----------------------------------------|---------|-------------------------|----------|------------|--------------|--|
| Specimen Name:                         |         | 20210729                |          |            |              |  |
| Tube Name:                             |         | 33                      |          |            |              |  |
| Record Date:                           |         | Jul 29, 2021 6:07:55 PM |          |            |              |  |
| Population                             | #Events | %Pare...                | Geo M... | APC-A Mean | APC-A Median |  |
| <span style="color: red;">■</span> P1  | 10,000  | 69.1                    | ####     | 4,628      | 2,165        |  |
| <span style="color: blue;">■</span> P2 | 9,067   | 90.7                    | ####     | 4,498      | 2,091        |  |
| <input checked="" type="checkbox"/> P3 | 8,780   | 96.8                    | 2,429    | 3,997      | 2,113        |  |
| <input checked="" type="checkbox"/> P4 | 8,720   | 96.2                    | ####     | 4,553      | 2,096        |  |
| <input checked="" type="checkbox"/> Q1 | 1       | 0.0                     | 12,227   | 12,227     | 12,227       |  |
| <input checked="" type="checkbox"/> Q2 | 864     | 9.5                     | 19,546   | 22,838     | 17,482       |  |
| <input checked="" type="checkbox"/> Q3 | 15      | 0.2                     | ####     | 1,023      | 723          |  |
| <input checked="" type="checkbox"/> Q4 | 8,187   | 90.3                    | ####     | 2,567      | 1,902        |  |

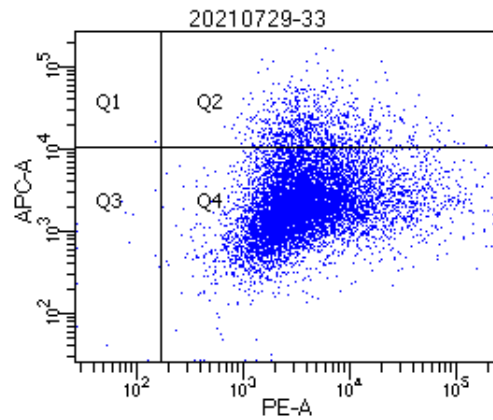

Supplement: 41420_2022_968_MOESM18_ESM.pdf [file 41420_2022_968_MOESM18_ESM.pdf]
