# Supplementary material for: A positive feedback loop: RAD18-YAP-TGF-β between triple-negative breast cancer and macrophages regulates cancer stemness and progression
Source: PubMed Central journal article supplement (PMC9005530; doi:10.1038/s41420-022-00968-9), 2022-04-12

Figure. 1I-GAPDH

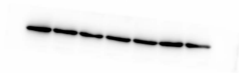

Figure. 1I-RAD18

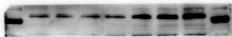

Supplement: 41420_2022_968_MOESM11_ESM.pdf [file 41420_2022_968_MOESM11_ESM.pdf]
