# Supplementary material for: A positive feedback loop: RAD18-YAP-TGF-β between triple-negative breast cancer and macrophages regulates cancer stemness and progression
Source: PubMed Central journal article supplement (PMC9005530; doi:10.1038/s41420-022-00968-9), 2022-04-12
Supplement: 41420_2022_968_MOESM17_ESM.pdf [file 41420_2022_968_MOESM17_ESM.pdf]

BD FACSDiva 8.0.2

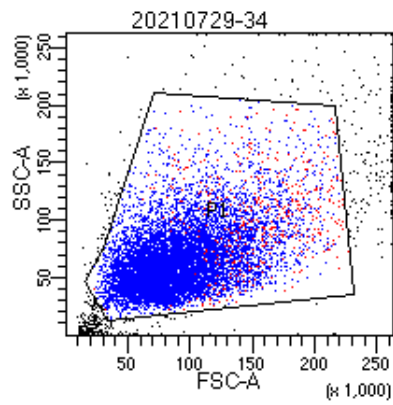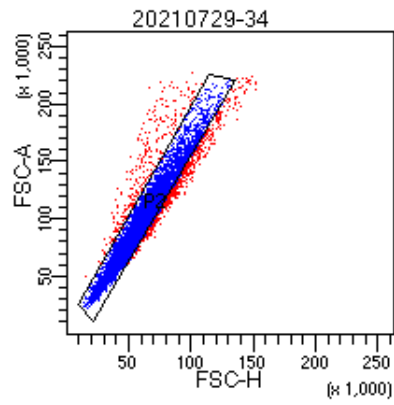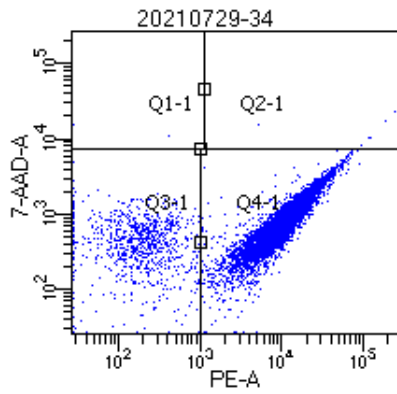

Tube: 34

| Population | #Events | %Parent | %Total |
|------------|---------|---------|--------|
| All Events | 10,000  | ####    | 100.0  |
| P1         | 9,458   | 94.6    | 94.6   |
| P2         | 8,607   | 91.0    | 86.1   |
| Q1         | 5       | 0.1     | 0.0    |
| Q2         | 276     | 3.2     | 2.8    |
| Q3         | 859     | 10.0    | 8.6    |
| Q4         | 7,467   | 86.8    | 74.7   |
| Q1-1       | 2       | 0.0     | 0.0    |
| Q2-1       | 8       | 0.1     | 0.1    |
| Q3-1       | 797     | 9.3     | 8.0    |
| Q4-1       | 7,800   | 90.6    | 78.0   |

BD FACSDiva 8.0.2

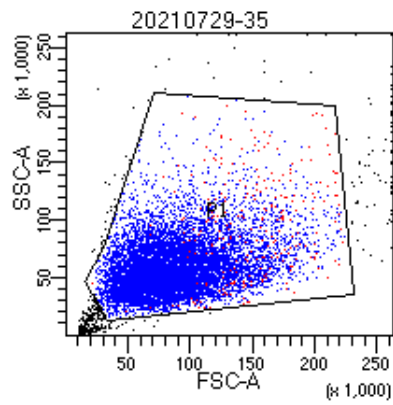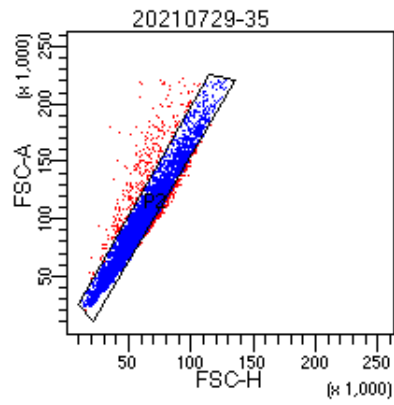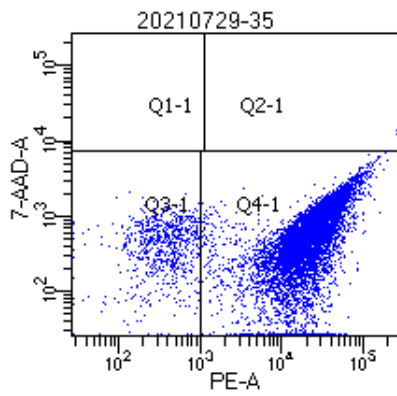

Tube: 35

| Population | #Events | %Parent | %Total |
|------------|---------|---------|--------|
| All Events | 10,000  | ####    | 100.0  |
| P1         | 9,568   | 95.7    | 95.7   |
| P2         | 9,076   | 94.9    | 90.8   |
| Q1         | 0       | 0.0     | 0.0    |
| Q2         | 130     | 1.4     | 1.3    |
| Q3         | 787     | 8.7     | 7.9    |
| Q4         | 8,159   | 89.9    | 81.6   |
| Q1-1       | 0       | 0.0     | 0.0    |
| Q2-1       | 2       | 0.0     | 0.0    |
| Q3-1       | 708     | 7.8     | 7.1    |
| Q4-1       | 8,366   | 92.2    | 83.7   |

BD FACSDiva 8.0.2

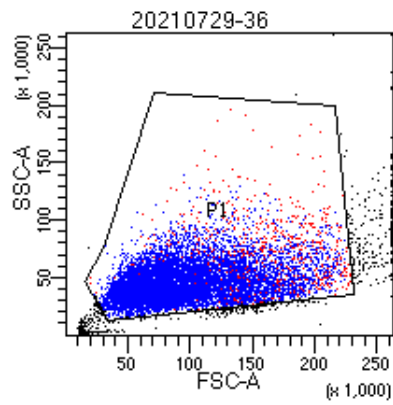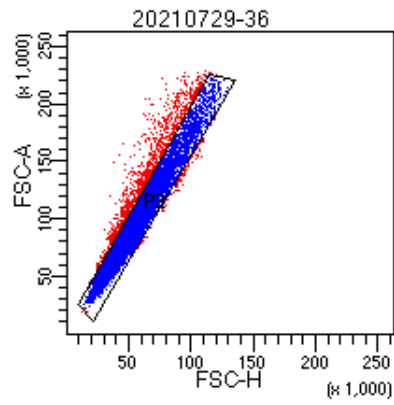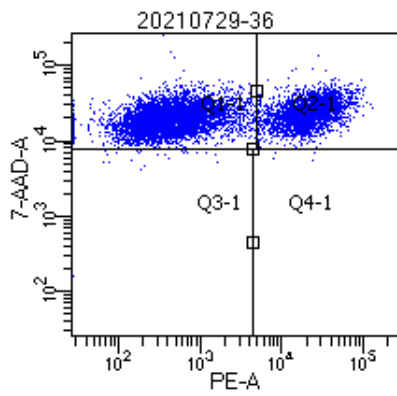

Tube: 36

| Population | #Events | %Parent | %Total |
|------------|---------|---------|--------|
| All Events | 10,000  | ####    | 100.0  |
| █ P1       | 9,335   | 93.4    | 93.4   |
| █ P2       | 8,075   | 86.5    | 80.8   |
| ☒ Q1       | 4,845   | 60.0    | 48.4   |
| ☒ Q2       | 3,229   | 40.0    | 32.3   |
| ☒ Q3       | 1       | 0.0     | 0.0    |
| ☒ Q4       | 0       | 0.0     | 0.0    |
| ☒ Q1-1     | 5,242   | 64.9    | 52.4   |
| ☒ Q2-1     | 2,803   | 34.7    | 28.0   |
| ☒ Q3-1     | 26      | 0.3     | 0.3    |
| ☒ Q4-1     | 4       | 0.0     | 0.0    |

BD FACSDiva 8.0.2

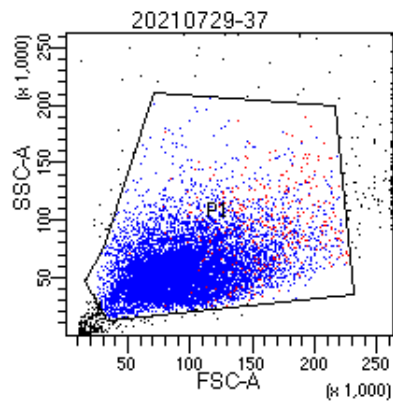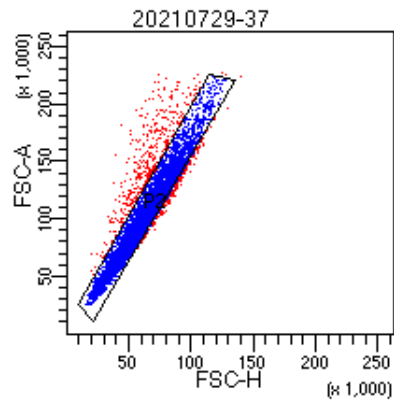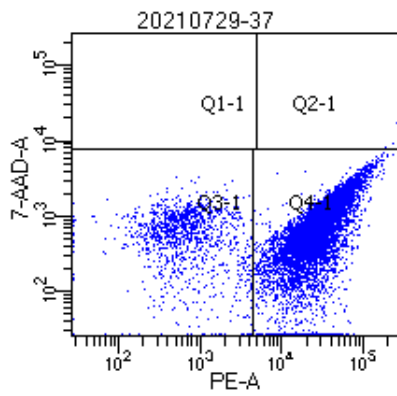

Tube: 37

| Population | #Events | %Parent | %Total |
|------------|---------|---------|--------|
| All Events | 10,000  | ####    | 100.0  |
| P1         | 9,526   | 95.3    | 95.3   |
| P2         | 8,849   | 92.9    | 88.5   |
| Q1         | 4       | 0.0     | 0.0    |
| Q2         | 319     | 3.6     | 3.2    |
| Q3         | 959     | 10.8    | 9.6    |
| Q4         | 7,567   | 85.5    | 75.7   |
| Q1-1       | 0       | 0.0     | 0.0    |
| Q2-1       | 4       | 0.0     | 0.0    |
| Q3-1       | 1,155   | 13.1    | 11.6   |
| Q4-1       | 7,690   | 86.9    | 76.9   |

BD FACSDiva 8.0.2

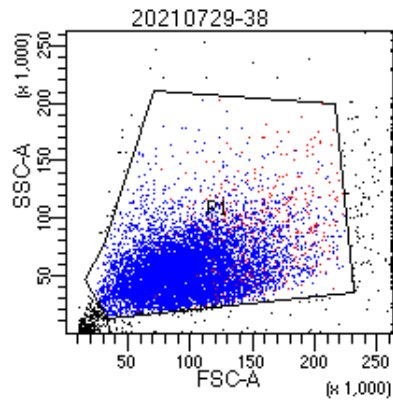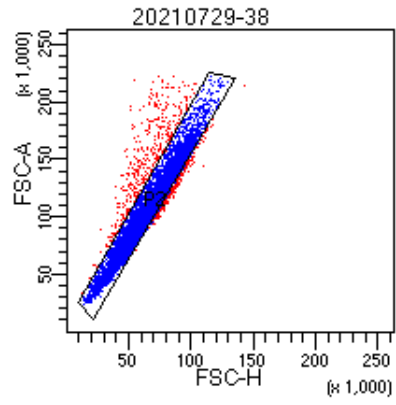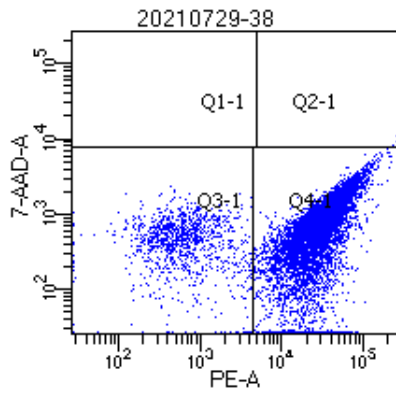

Tube: 38

| Population | #Events | %Parent | %Total |
|------------|---------|---------|--------|
| All Events | 10,000  | ####    | 100.0  |
| P1         | 9,350   | 93.5    | 93.5   |
| P2         | 8,700   | 93.0    | 87.0   |
| Q1         | 0       | 0.0     | 0.0    |
| Q2         | 265     | 3.0     | 2.6    |
| Q3         | 893     | 10.3    | 8.9    |
| Q4         | 7,542   | 86.7    | 75.4   |
| Q1-1       | 0       | 0.0     | 0.0    |
| Q2-1       | 4       | 0.0     | 0.0    |
| Q3-1       | 1,056   | 12.1    | 10.6   |
| Q4-1       | 7,640   | 87.8    | 76.4   |

BD FACSDiva 8.0.2

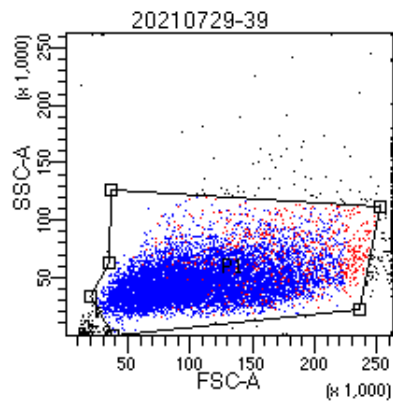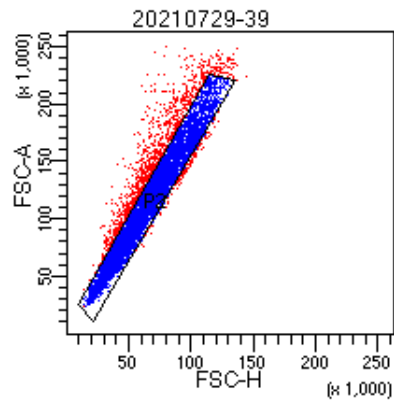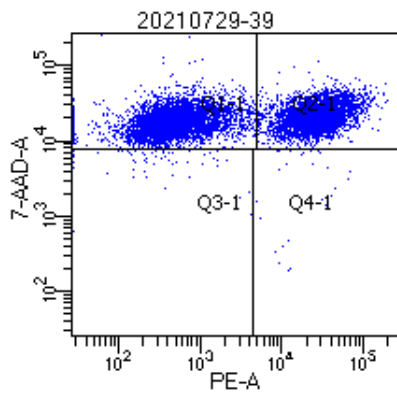

Tube: 39

| Population | #Events | %Parent | %Total |
|------------|---------|---------|--------|
| All Events | 10,000  | ####    | 100.0  |
| P1         | 9,529   | 95.3    | 95.3   |
| P2         | 8,176   | 85.8    | 81.8   |
| Q1         | 3,867   | 47.3    | 38.7   |
| Q2         | 4,292   | 52.5    | 42.9   |
| Q3         | 2       | 0.0     | 0.0    |
| Q4         | 15      | 0.2     | 0.2    |
| Q1-1       | 4,218   | 51.6    | 42.2   |
| Q2-1       | 3,870   | 47.3    | 38.7   |
| Q3-1       | 60      | 0.7     | 0.6    |
| Q4-1       | 28      | 0.3     | 0.3    |

BD FACSDiva 8.0.2

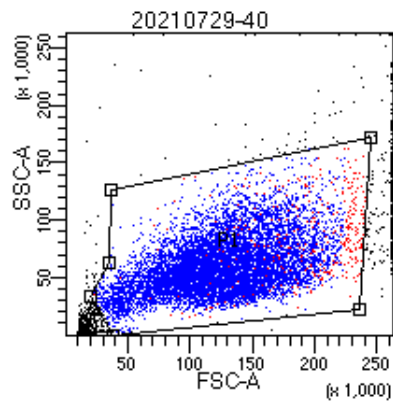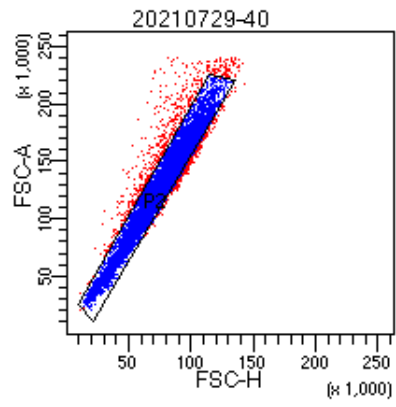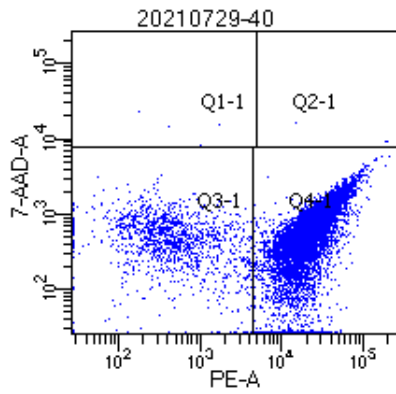

Tube: 40

| Population | #Events | %Parent | %Total |
|------------|---------|---------|--------|
| All Events | 10,000  | ####    | 100.0  |
| P1         | 9,035   | 90.4    | 90.4   |
| P2         | 8,142   | 90.1    | 81.4   |
| Q1         | 6       | 0.1     | 0.1    |
| Q2         | 87      | 1.1     | 0.9    |
| Q3         | 1,023   | 12.6    | 10.2   |
| Q4         | 7,026   | 86.3    | 70.3   |
| Q1-1       | 4       | 0.0     | 0.0    |
| Q2-1       | 3       | 0.0     | 0.0    |
| Q3-1       | 1,218   | 15.0    | 12.2   |
| Q4-1       | 6,917   | 85.0    | 69.2   |

BD FACSDiva 8.0.2

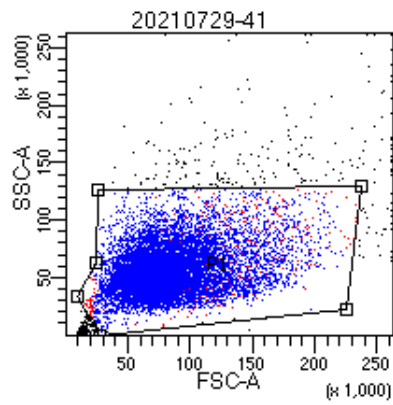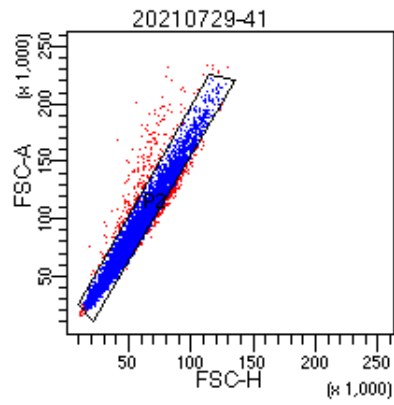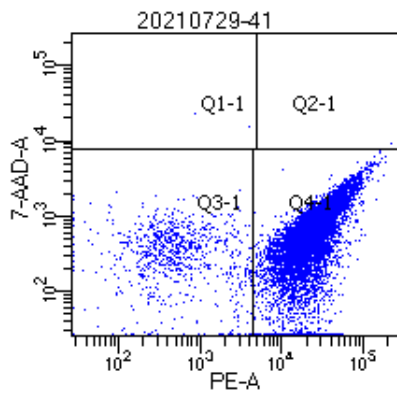

Tube: 41

| Population | #Events | %Parent | %Total |
|------------|---------|---------|--------|
| All Events | 10,000  | ####    | 100.0  |
| P1         | 9,594   | 95.9    | 95.9   |
| P2         | 9,135   | 95.2    | 91.4   |
| Q1         | 1       | 0.0     | 0.0    |
| Q2         | 171     | 1.9     | 1.7    |
| Q3         | 630     | 6.9     | 6.3    |
| Q4         | 8,333   | 91.2    | 83.3   |
| Q1-1       | 2       | 0.0     | 0.0    |
| Q2-1       | 1       | 0.0     | 0.0    |
| Q3-1       | 773     | 8.5     | 7.7    |
| Q4-1       | 8,359   | 91.5    | 83.6   |



BD FACSDiva 8.0.2

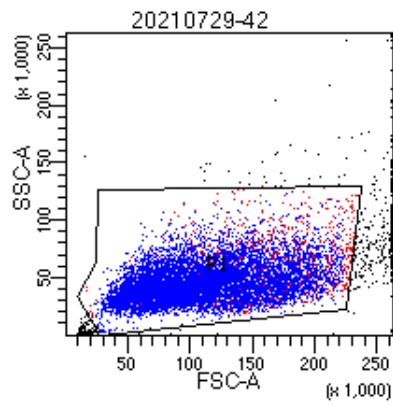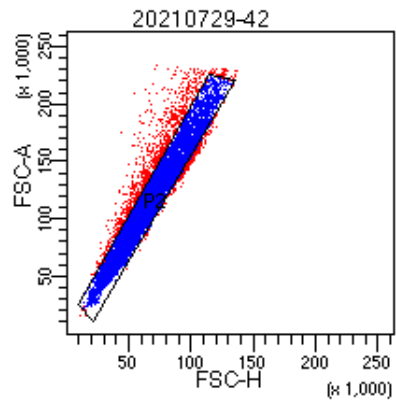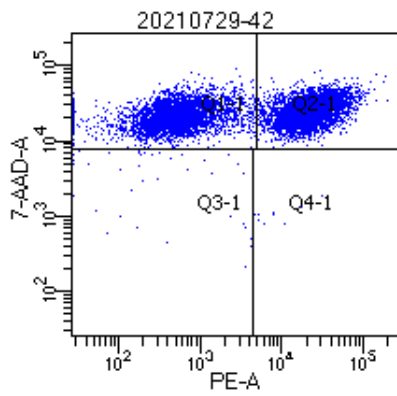

Tube: 42

| Population | #Events | %Parent | %Total |
|------------|---------|---------|--------|
| All Events | 10,000  | ####    | 100.0  |
| P1         | 9,453   | 94.5    | 94.5   |
| P2         | 8,240   | 87.2    | 82.4   |
| Q1         | 3,470   | 42.1    | 34.7   |
| Q2         | 4,745   | 57.6    | 47.4   |
| Q3         | 7       | 0.1     | 0.1    |
| Q4         | 18      | 0.2     | 0.2    |
| Q1-1       | 3,792   | 46.0    | 37.9   |
| Q2-1       | 4,398   | 53.4    | 44.0   |
| Q3-1       | 38      | 0.5     | 0.4    |
| Q4-1       | 12      | 0.1     | 0.1    |

BD FACSDiva 8.0.2

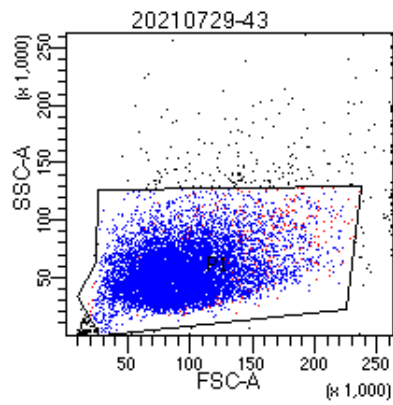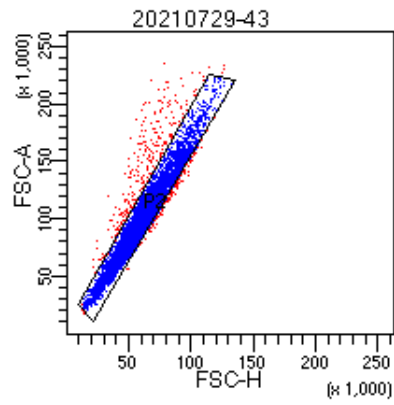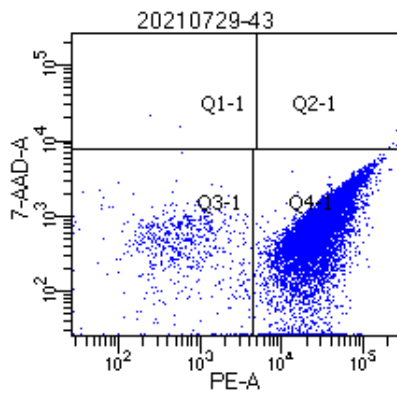

Tube: 43

| Population | #Events | %Parent | %Total |
|------------|---------|---------|--------|
| All Events | 10,000  | ####    | 100.0  |
| P1         | 9,623   | 96.2    | 96.2   |
| P2         | 9,176   | 95.4    | 91.8   |
| Q1         | 5       | 0.1     | 0.0    |
| Q2         | 306     | 3.3     | 3.1    |
| Q3         | 492     | 5.4     | 4.9    |
| Q4         | 8,373   | 91.2    | 83.7   |
| Q1-1       | 2       | 0.0     | 0.0    |
| Q2-1       | 5       | 0.1     | 0.0    |
| Q3-1       | 601     | 6.5     | 6.0    |
| Q4-1       | 8,568   | 93.4    | 85.7   |

BD FACSDiva 8.0.2

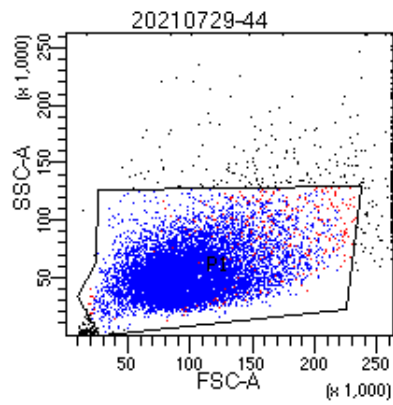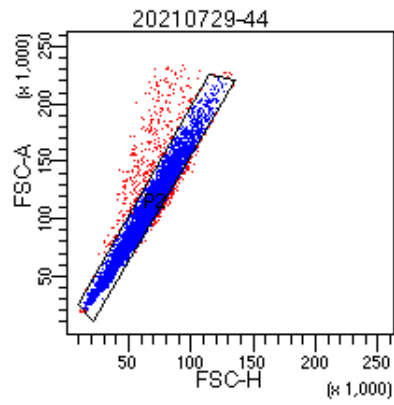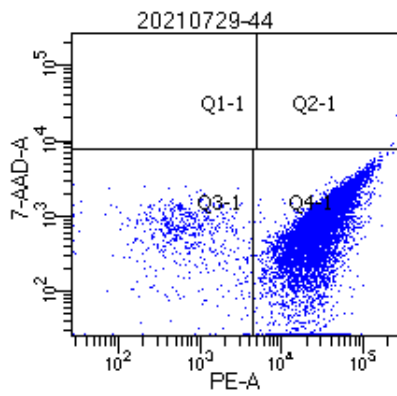

Tube: 44

| Population | #Events | %Parent | %Total |
|------------|---------|---------|--------|
| All Events | 10,000  | ####    | 100.0  |
| P1         | 9,527   | 95.3    | 95.3   |
| P2         | 8,978   | 94.2    | 89.8   |
| Q1         | 0       | 0.0     | 0.0    |
| Q2         | 358     | 4.0     | 3.6    |
| Q3         | 450     | 5.0     | 4.5    |
| Q4         | 8,170   | 91.0    | 81.7   |
| Q1-1       | 0       | 0.0     | 0.0    |
| Q2-1       | 5       | 0.1     | 0.0    |
| Q3-1       | 564     | 6.3     | 5.6    |
| Q4-1       | 8,409   | 93.7    | 84.1   |

BD FACSDiva 8.0.2

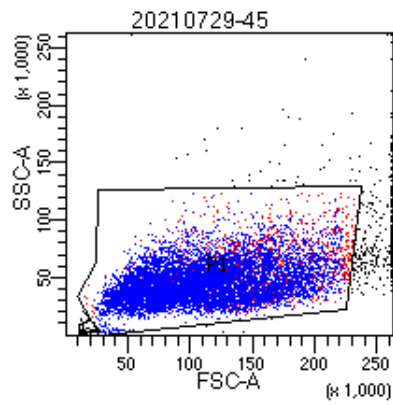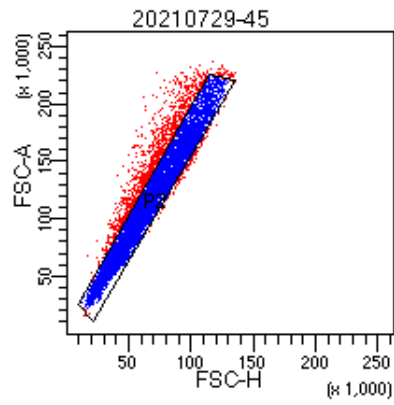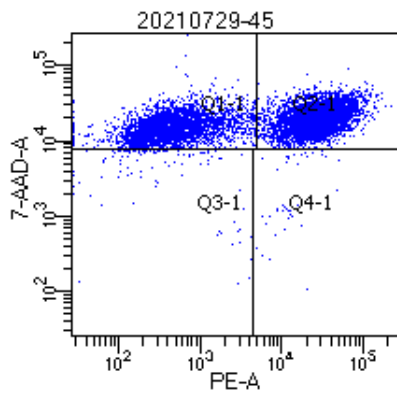

Tube: 45

| Population | #Events | %Parent | %Total |
|------------|---------|---------|--------|
| All Events | 10,000  | ####    | 100.0  |
| █ P1       | 9,446   | 94.5    | 94.5   |
| █ P2       | 8,083   | 85.6    | 80.8   |
| ☒ Q1       | 3,141   | 38.9    | 31.4   |
| ☒ Q2       | 4,897   | 60.6    | 49.0   |
| ☒ Q3       | 7       | 0.1     | 0.1    |
| ☒ Q4       | 38      | 0.5     | 0.4    |
| ☒ Q1-1     | 3,391   | 42.0    | 33.9   |
| ☒ Q2-1     | 4,533   | 56.1    | 45.3   |
| ☒ Q3-1     | 119     | 1.5     | 1.2    |
| ☒ Q4-1     | 40      | 0.5     | 0.4    |
